# Supplementary material
Source: MDPI journal article supplement (https://www.mdpi.com/1424-8247/16/3/461)
Supplement: s1 [file s1]

## Supplementary Materials

## Design, Synthesis, and Biological Evaluation of Pyridinesulfonamide Derivatives as Novel PI3K/mTOR Dual Inhibitors

Haotian Gao <sup>1</sup>, Zaolin Li <sup>1</sup>, Yuhan Zhang <sup>1</sup>, Tong Wang <sup>1</sup>, Kai Wang <sup>2</sup>, Fang Wang <sup>2,\*</sup> and Youjun Xu <sup>1,\*</sup>

<sup>1</sup> Key Laboratory of Structure-Based Drug Design and Discovery (Ministry of Education), School of Pharmaceutical Engineering, Shenyang Pharmaceutical University, Shenyang, 110016, China

<sup>2</sup> Faculty of functional food and wine, Shenyang Pharmaceutical University, Shenyang 110016, China

\* Correspondence: e-mail@e-mail.com: ([xuyoujun@syphu.edu.cn](mailto:xuyoujun@syphu.edu.cn) (Y. Xu); [Wangf@syphu.edu.cn](mailto:Wangf@syphu.edu.cn) (F. Wang))

## NMR spectra for final compounds

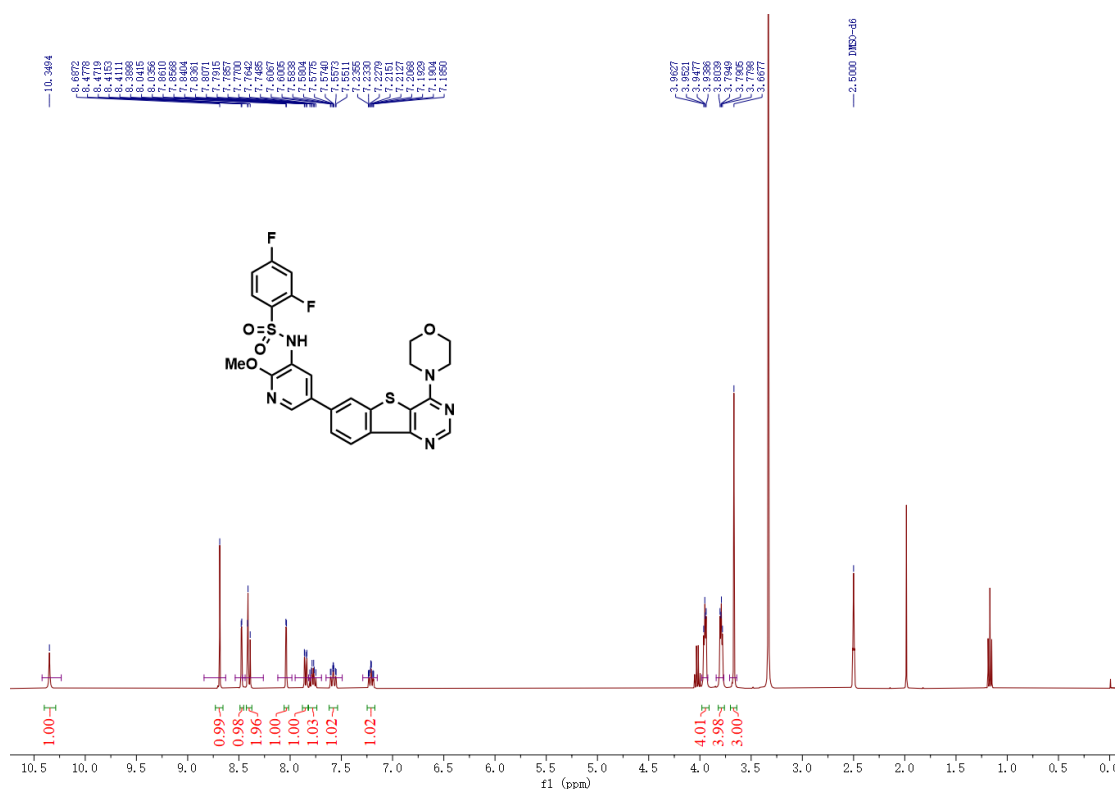

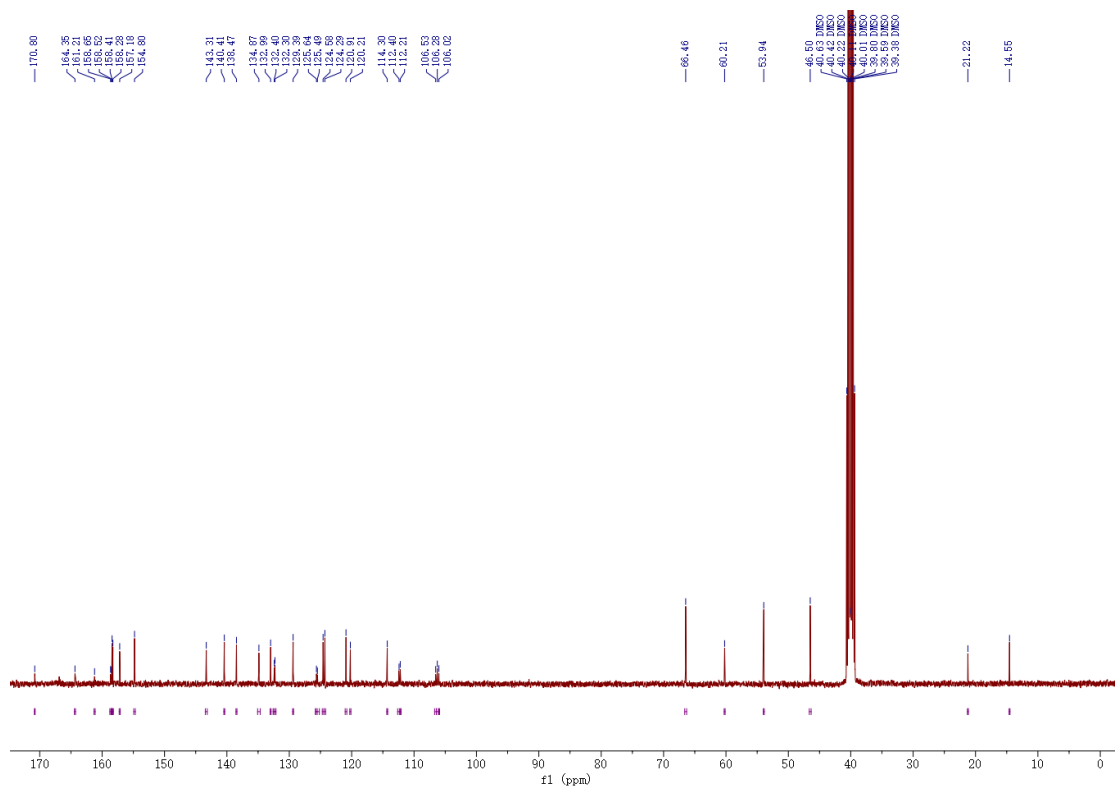

**Figure S1.**  $^1\text{H}$  and  $^{13}\text{C}$  NMR spectra of **11a** (DMSO- $d_6$ ).

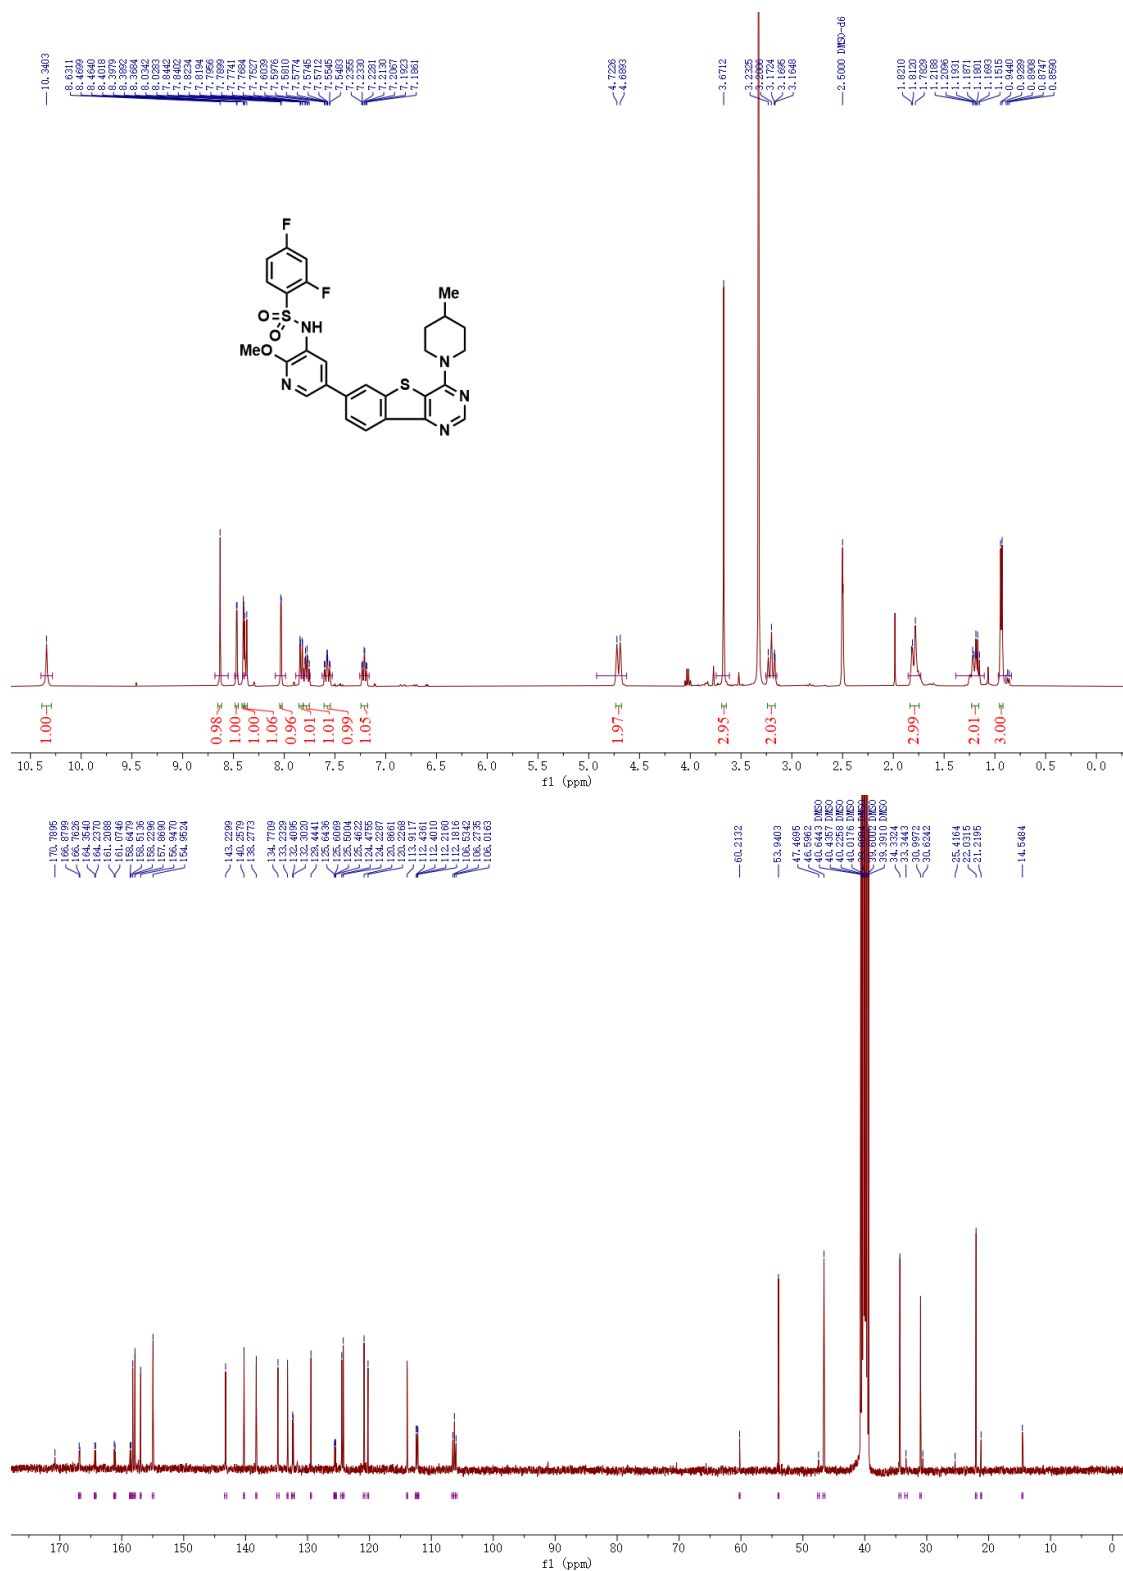

**Figure S2.** <sup>1</sup>H and <sup>13</sup>C NMR spectra of **11b** (DMSO-d<sub>6</sub>).

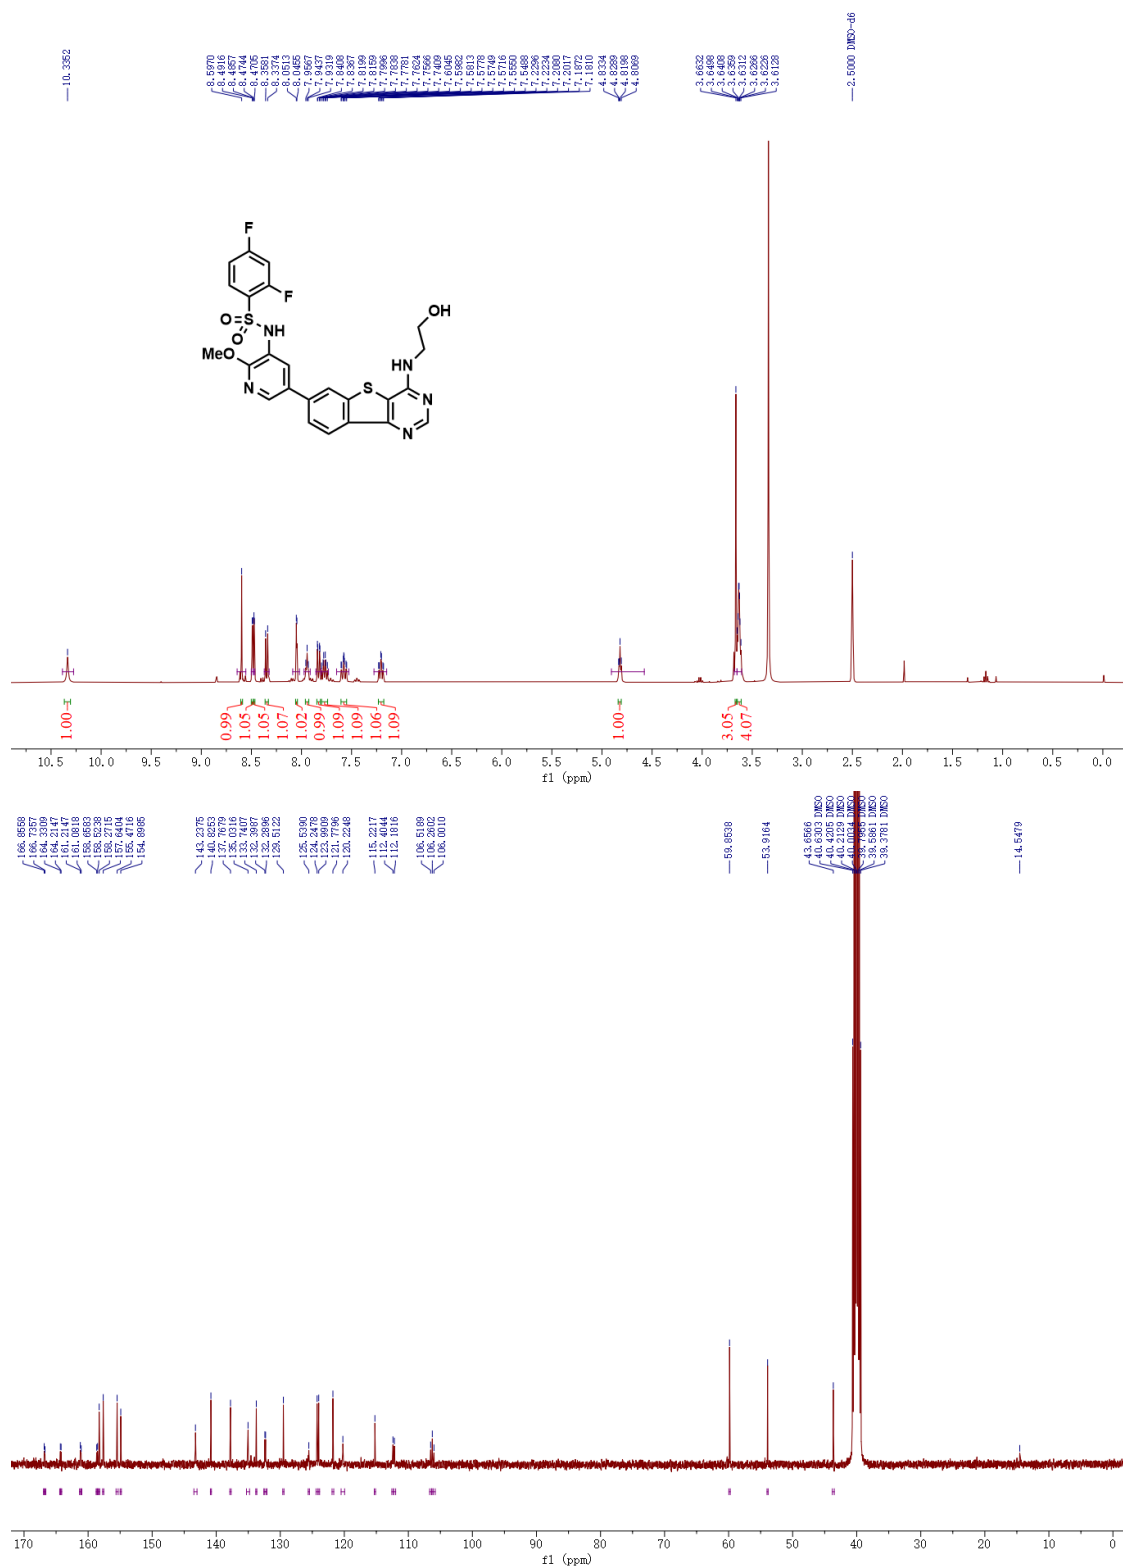

Figure S3. <sup>1</sup>H and <sup>13</sup>C NMR spectra of 11c (DMSO-d<sub>6</sub>).

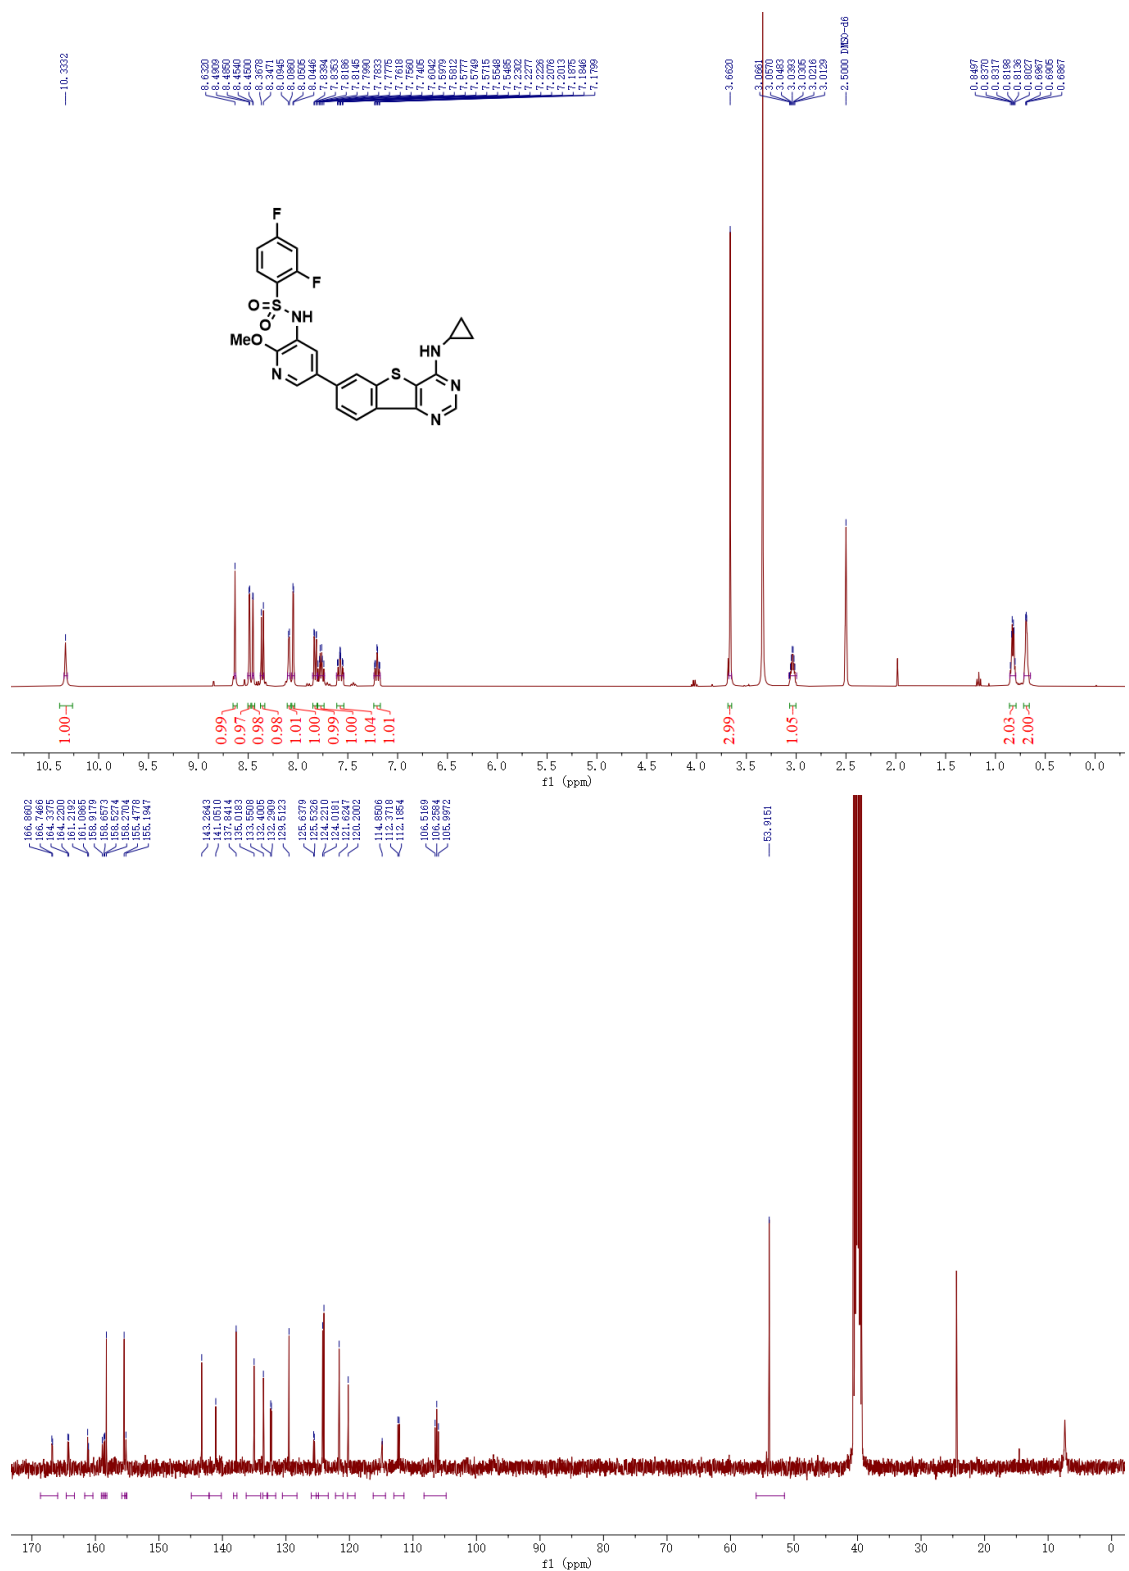

**Figure S4.** <sup>1</sup>H and <sup>13</sup>C NMR spectra of **11d** (DMSO-d<sub>6</sub>).

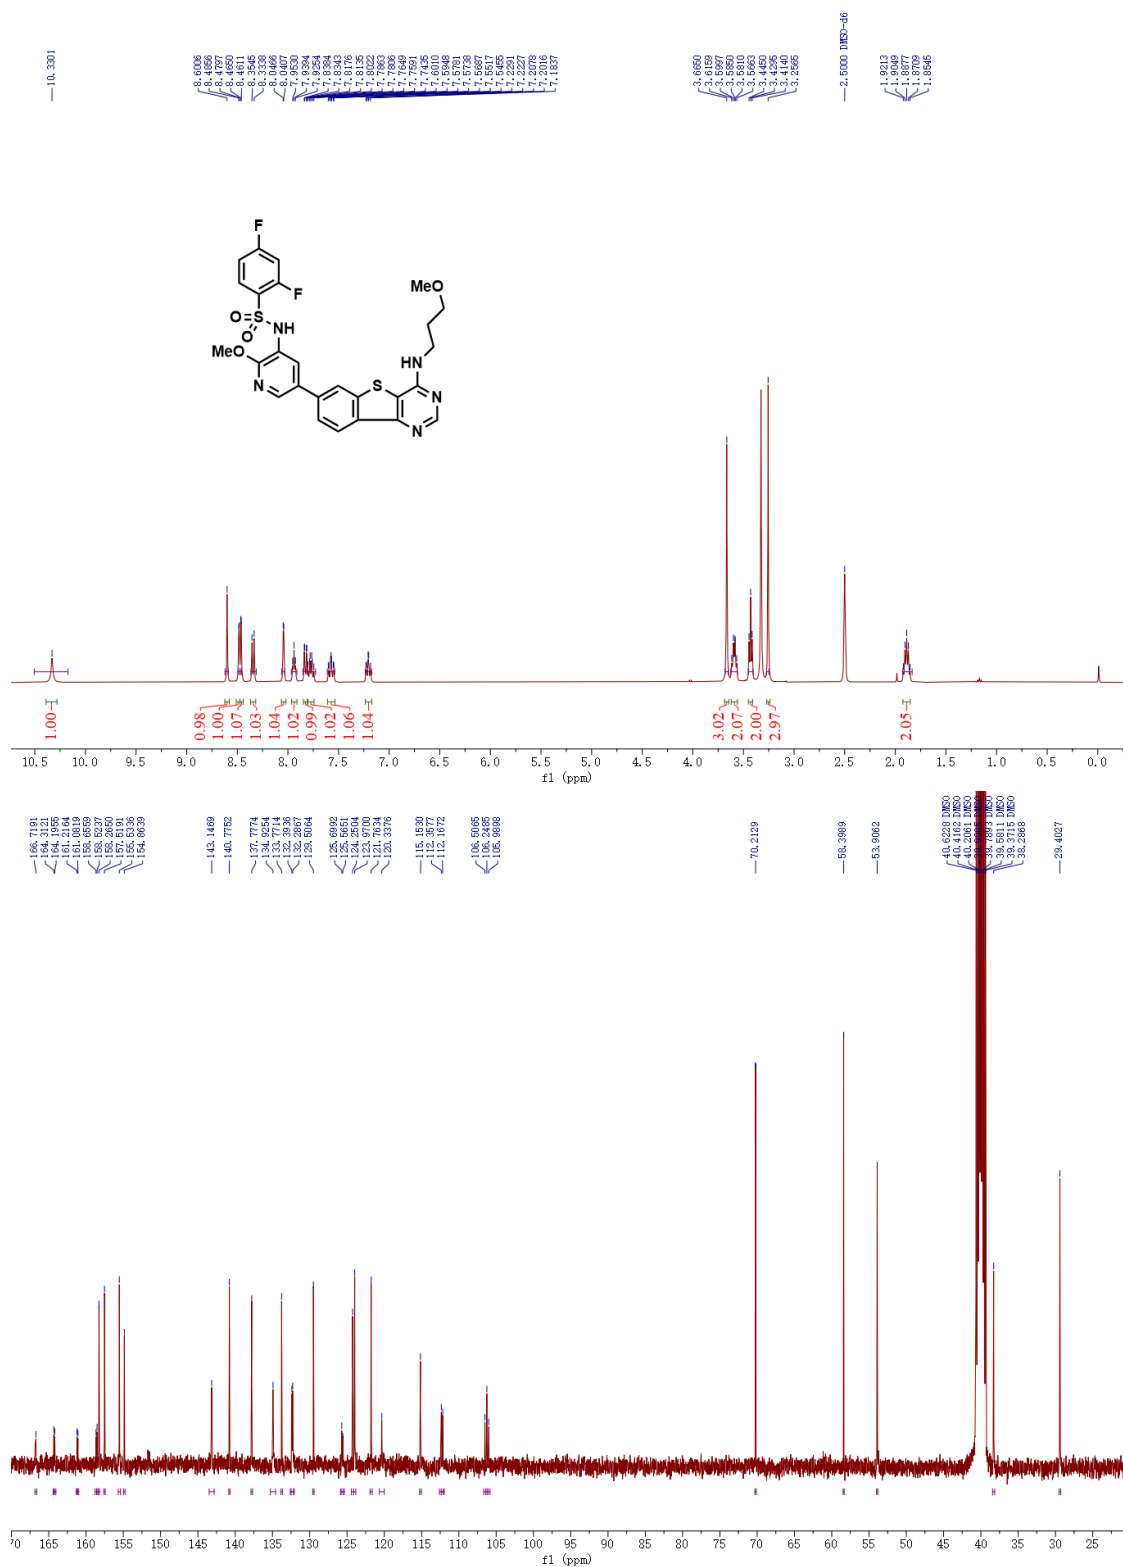

Figure S5. <sup>1</sup>H and <sup>13</sup>C NMR spectra of 11e (DMSO-d<sub>6</sub>).



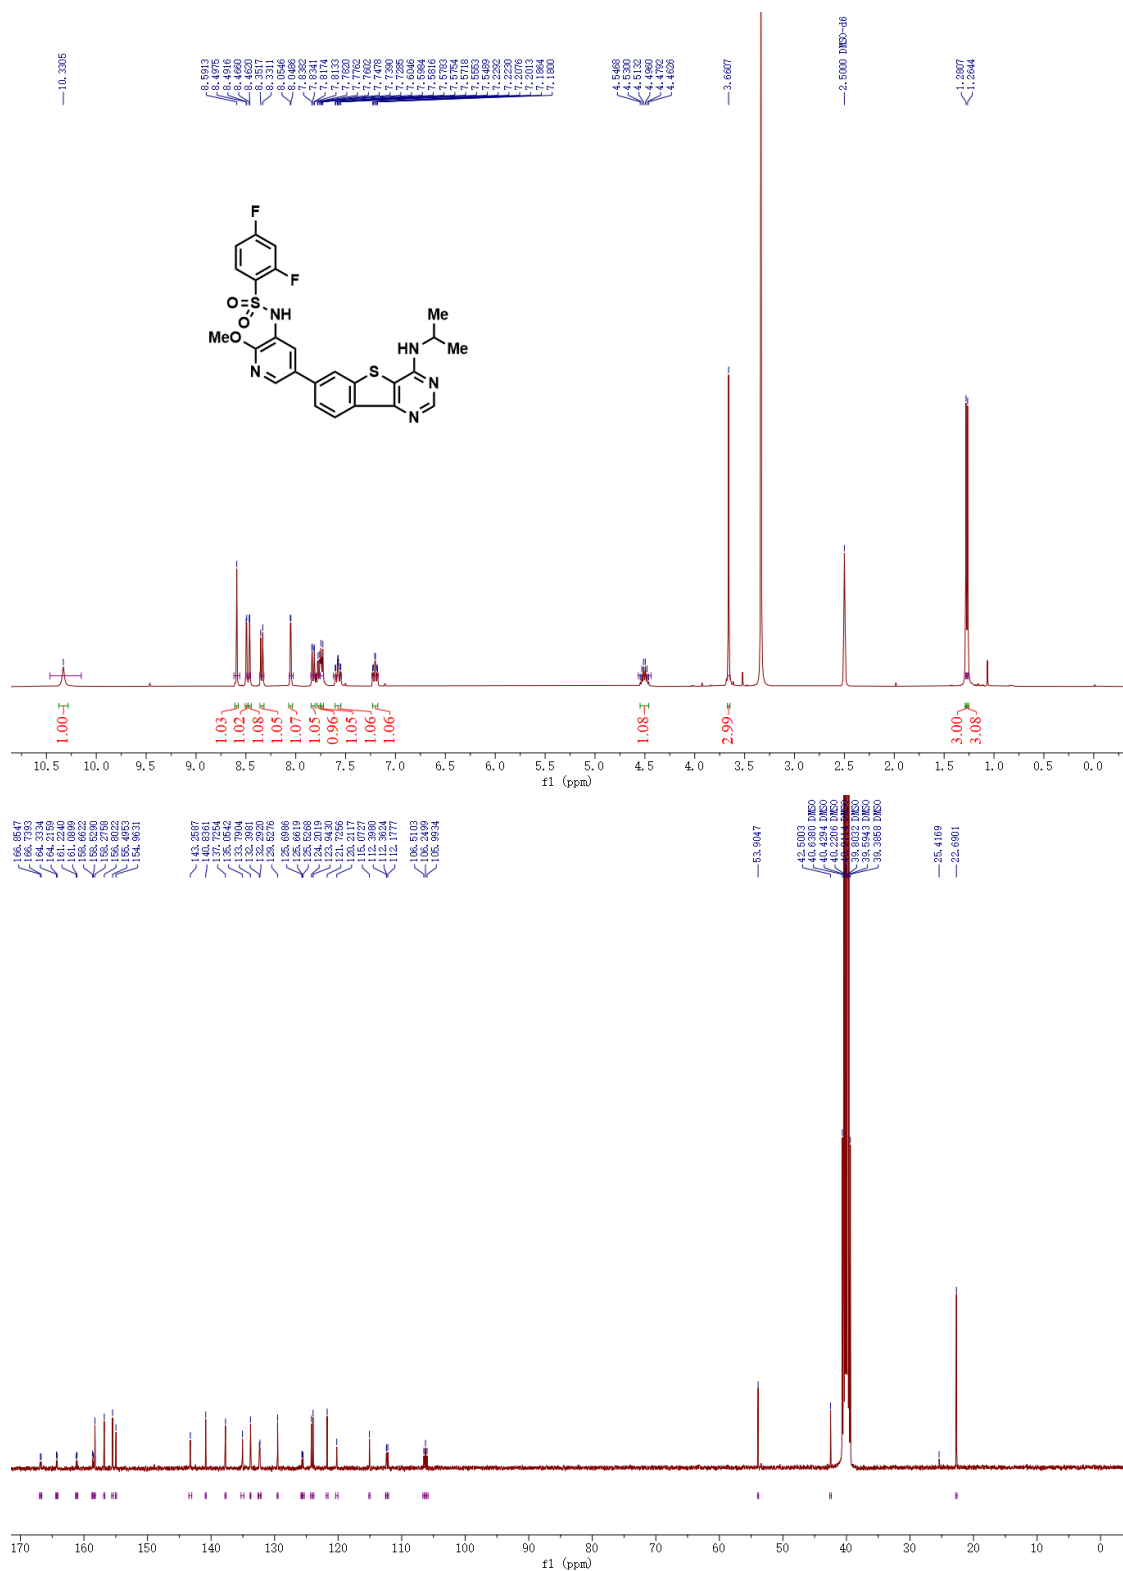

Figure S7. <sup>1</sup>H and <sup>13</sup>C NMR spectra of 11g (DMSO-d<sub>6</sub>).



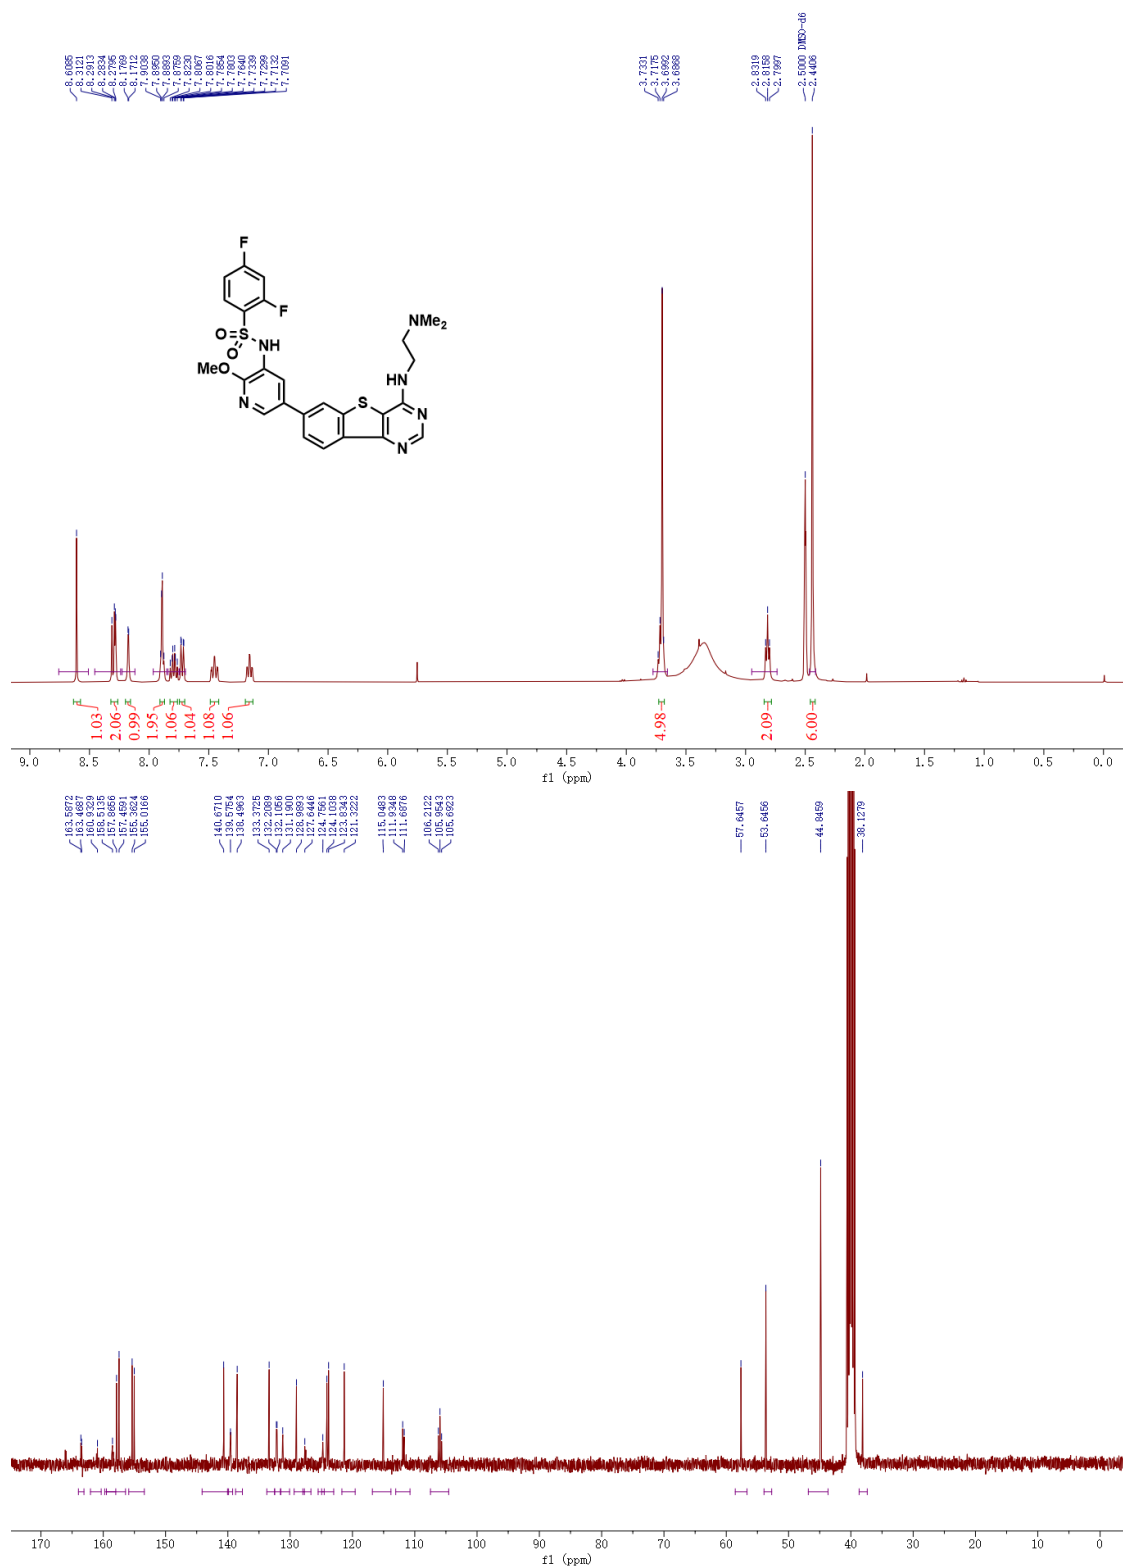

**Figure S8** <sup>1</sup>H and <sup>13</sup>C NMR spectra of **11h** (DMSO-d<sub>6</sub>).

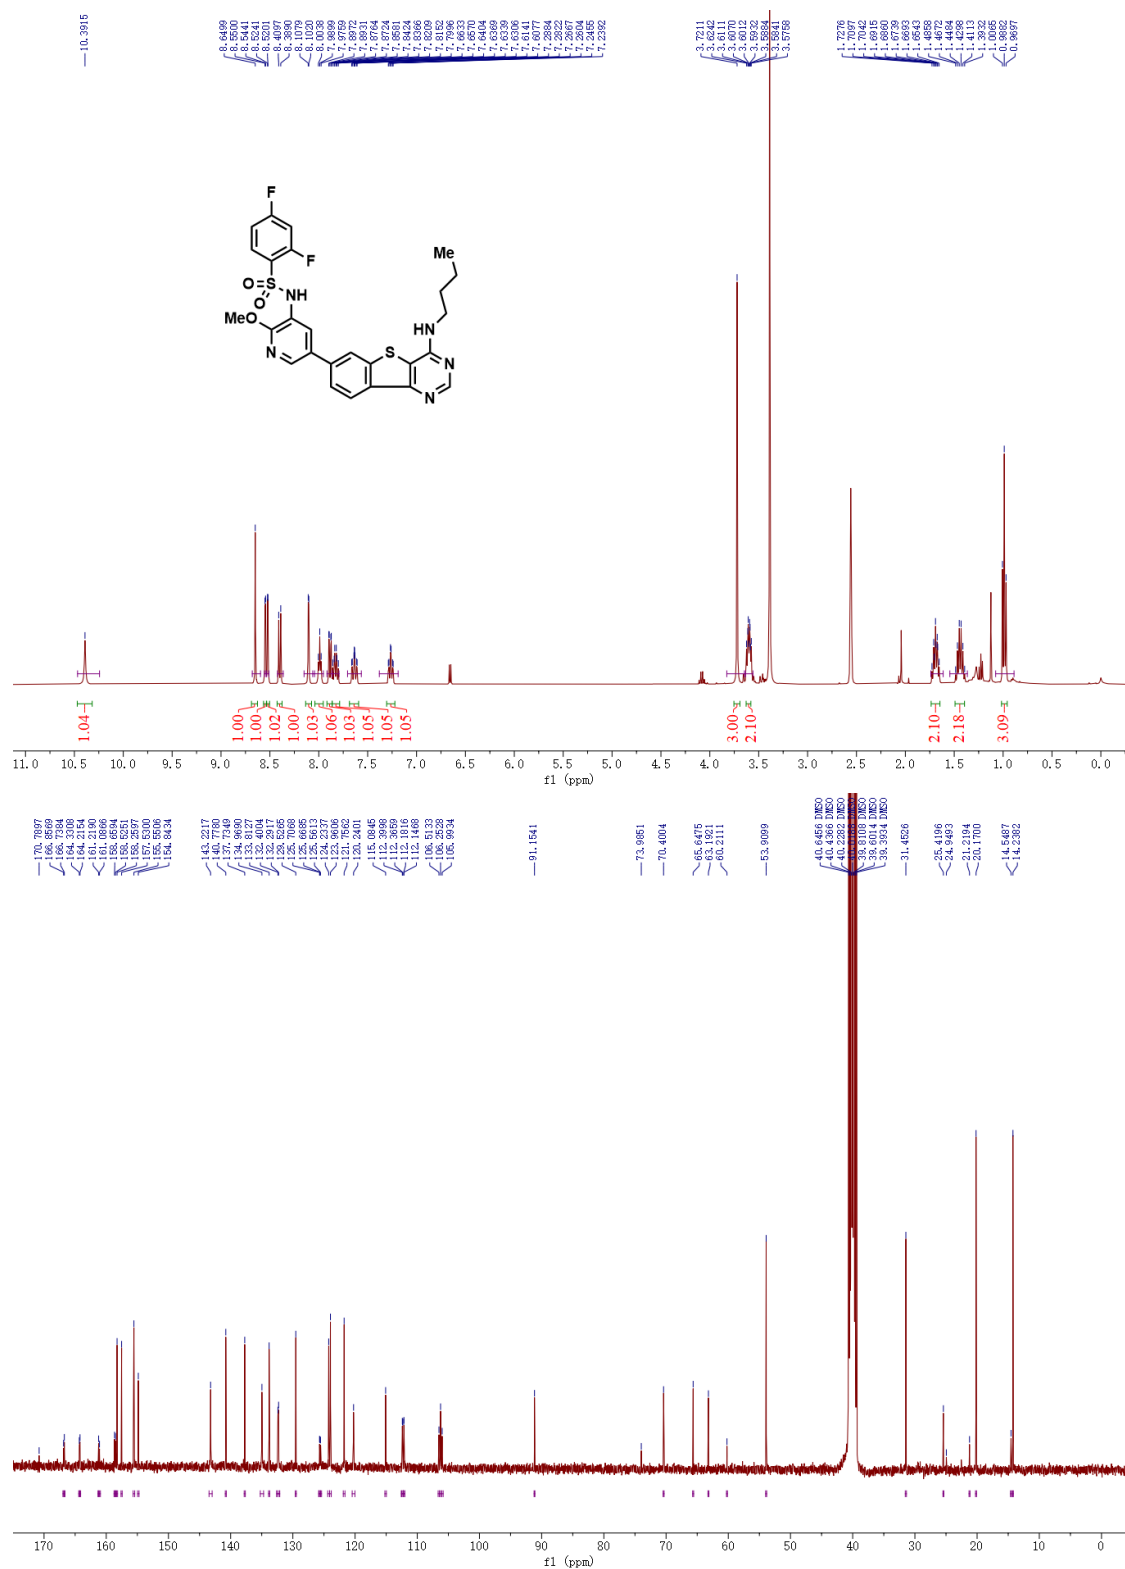

**Figure S9.** <sup>1</sup>H and <sup>13</sup>C NMR spectra of **11i** (DMSO-d<sub>6</sub>).

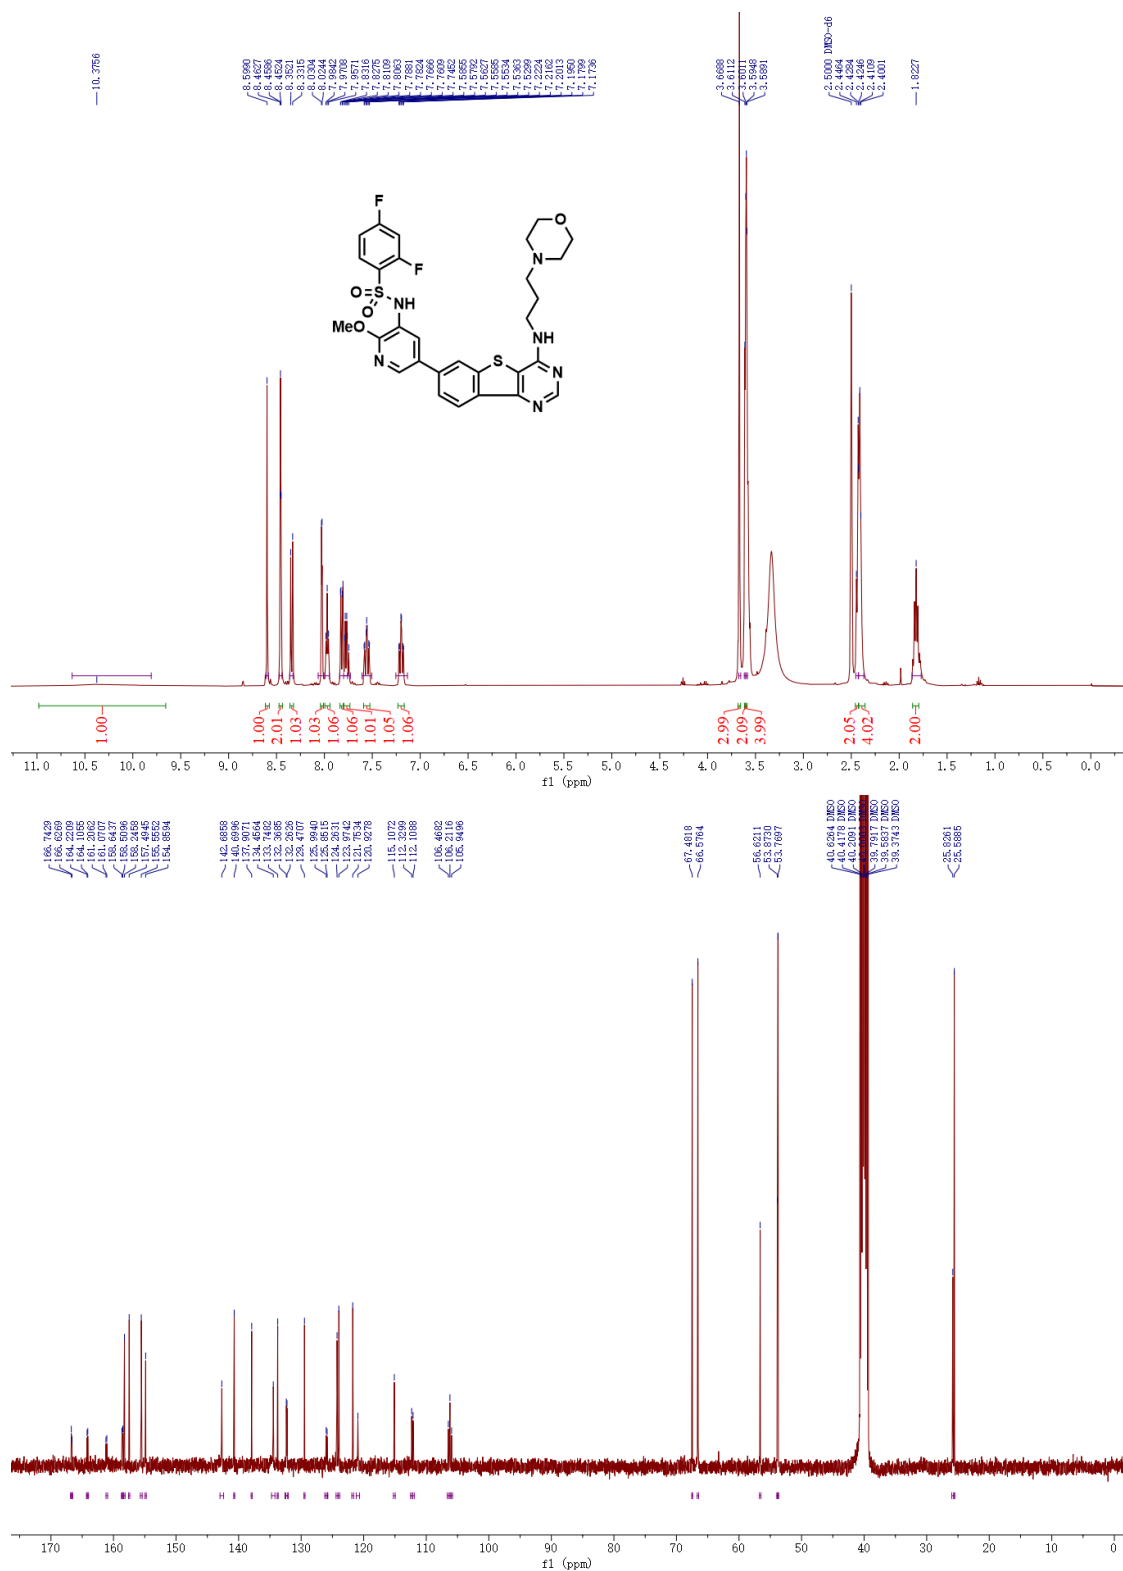

**Figure S10.** <sup>1</sup>H and <sup>13</sup>C NMR spectra of **11j** (DMSO-d<sub>6</sub>).

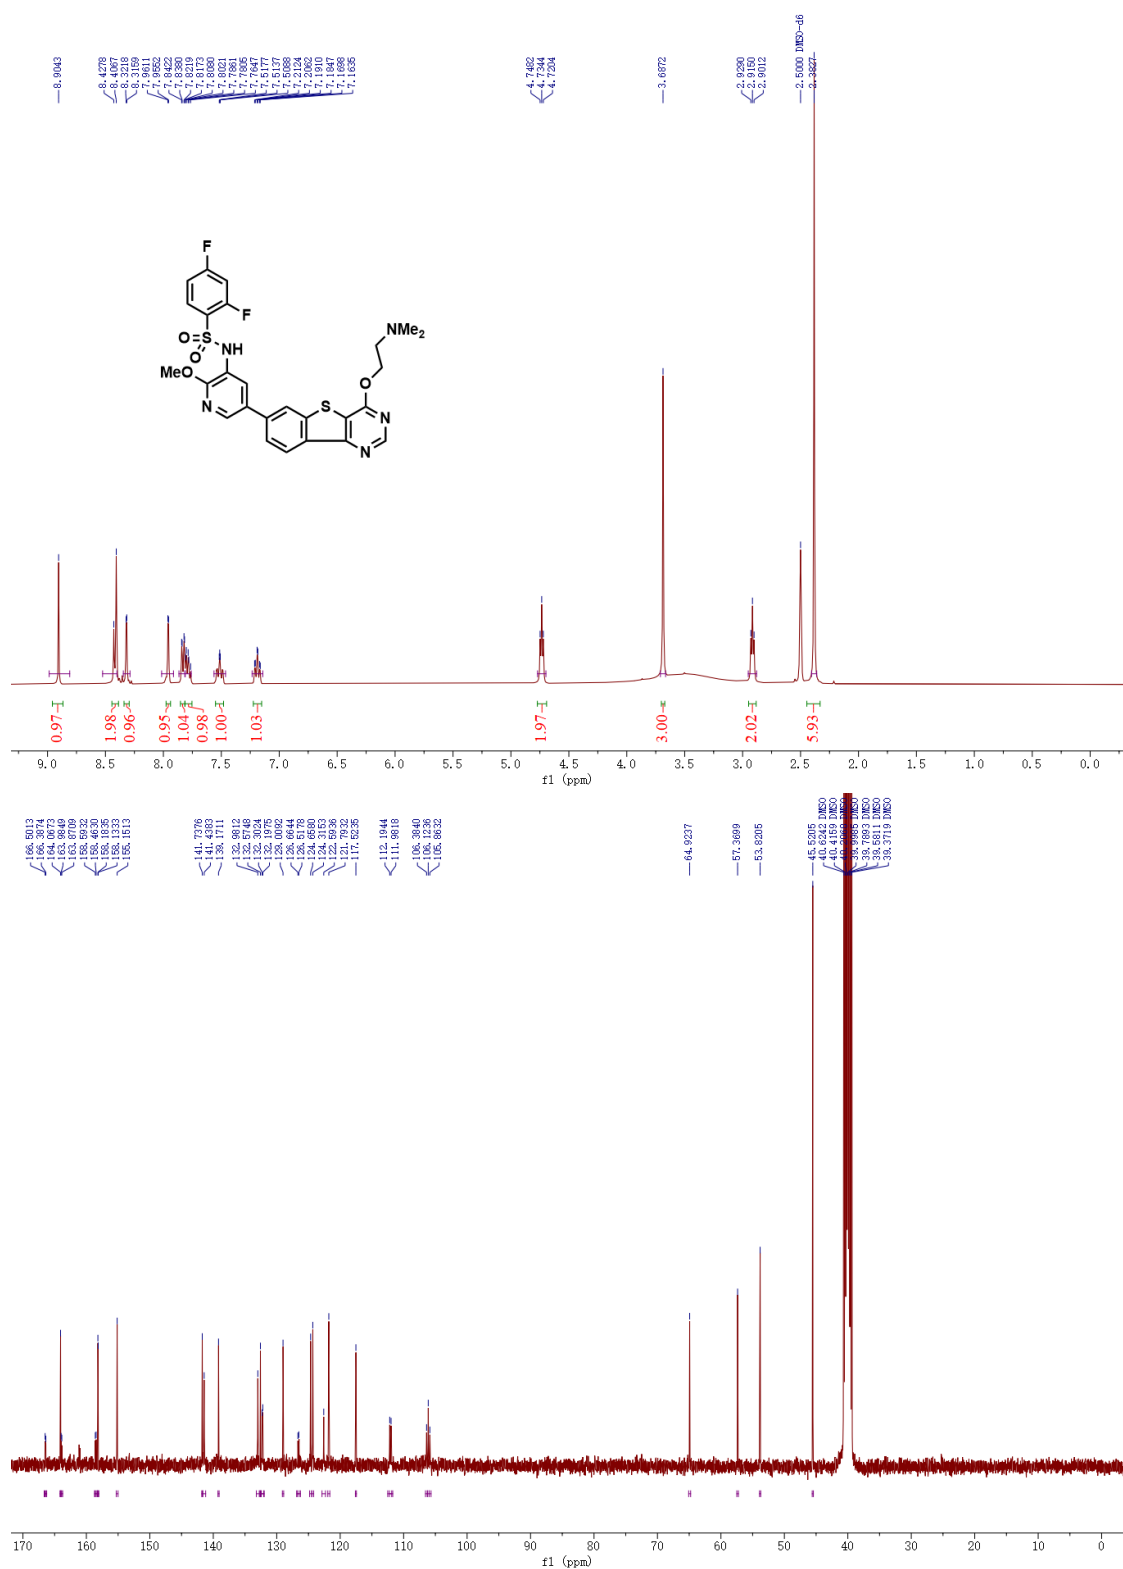

**Figure S11.** <sup>1</sup>H and <sup>13</sup>C NMR spectra of **11k** (DMSO-d<sub>6</sub>).

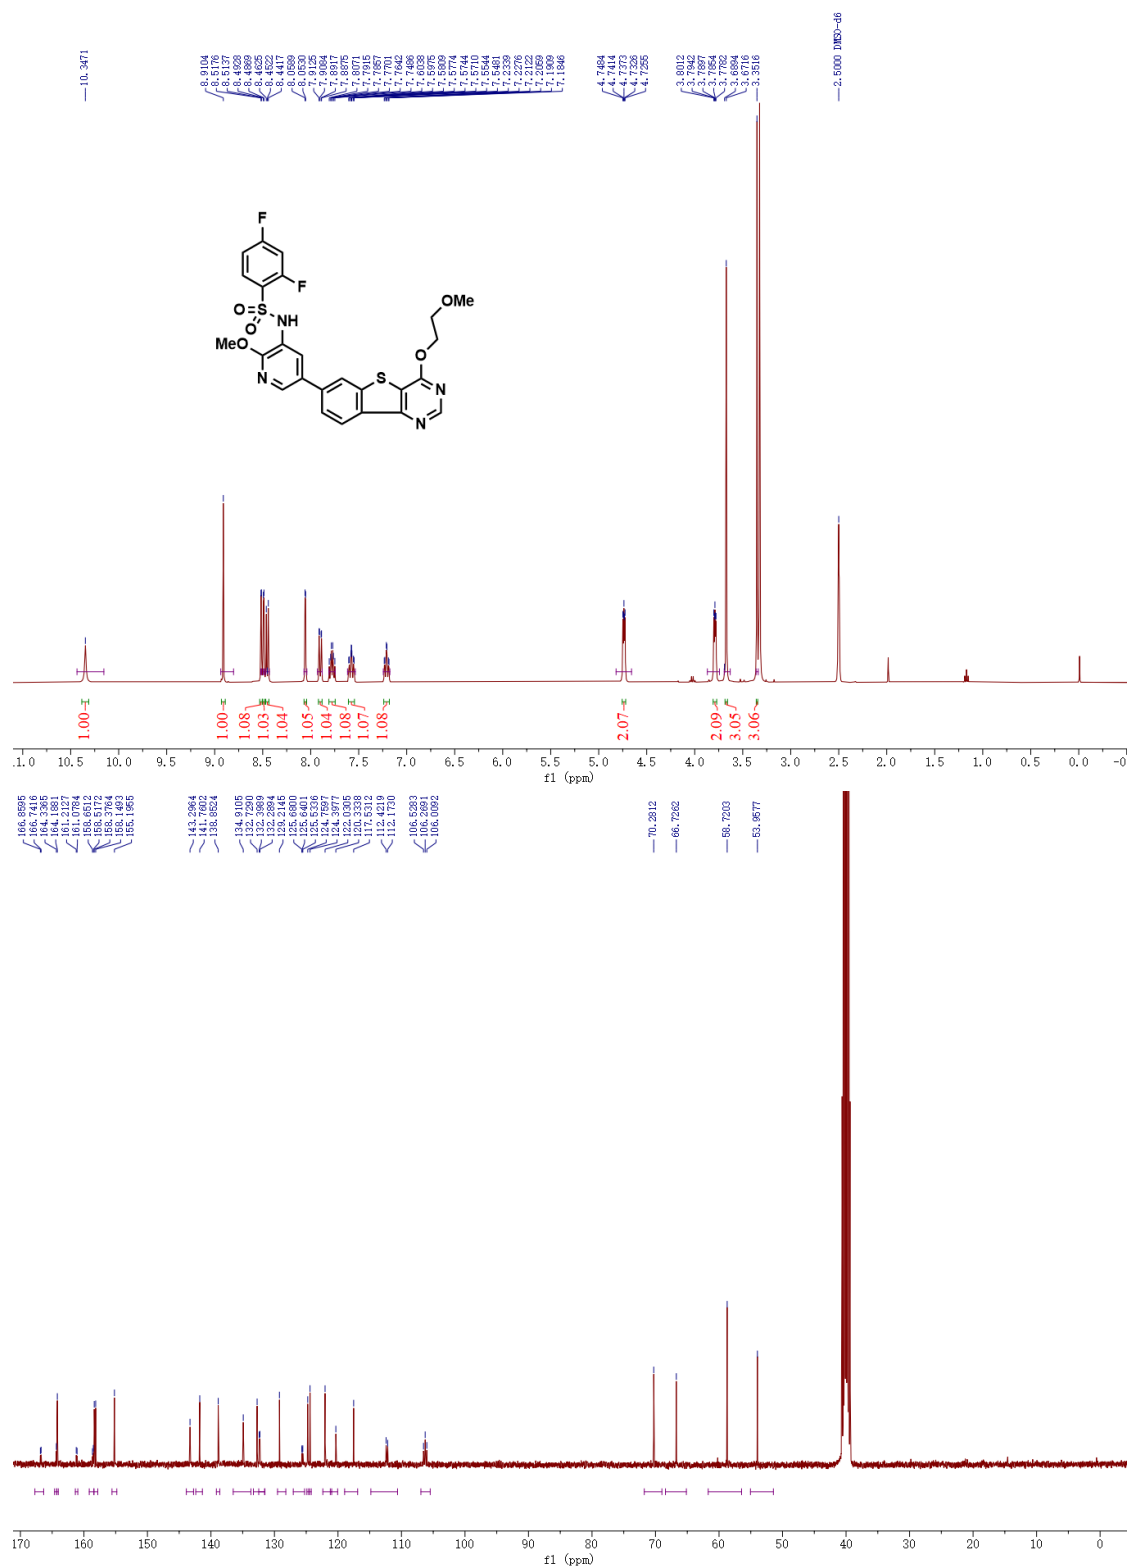

**Figure S12.** <sup>1</sup>H and <sup>13</sup>C NMR spectra of **111** (DMSO-d<sub>6</sub>).

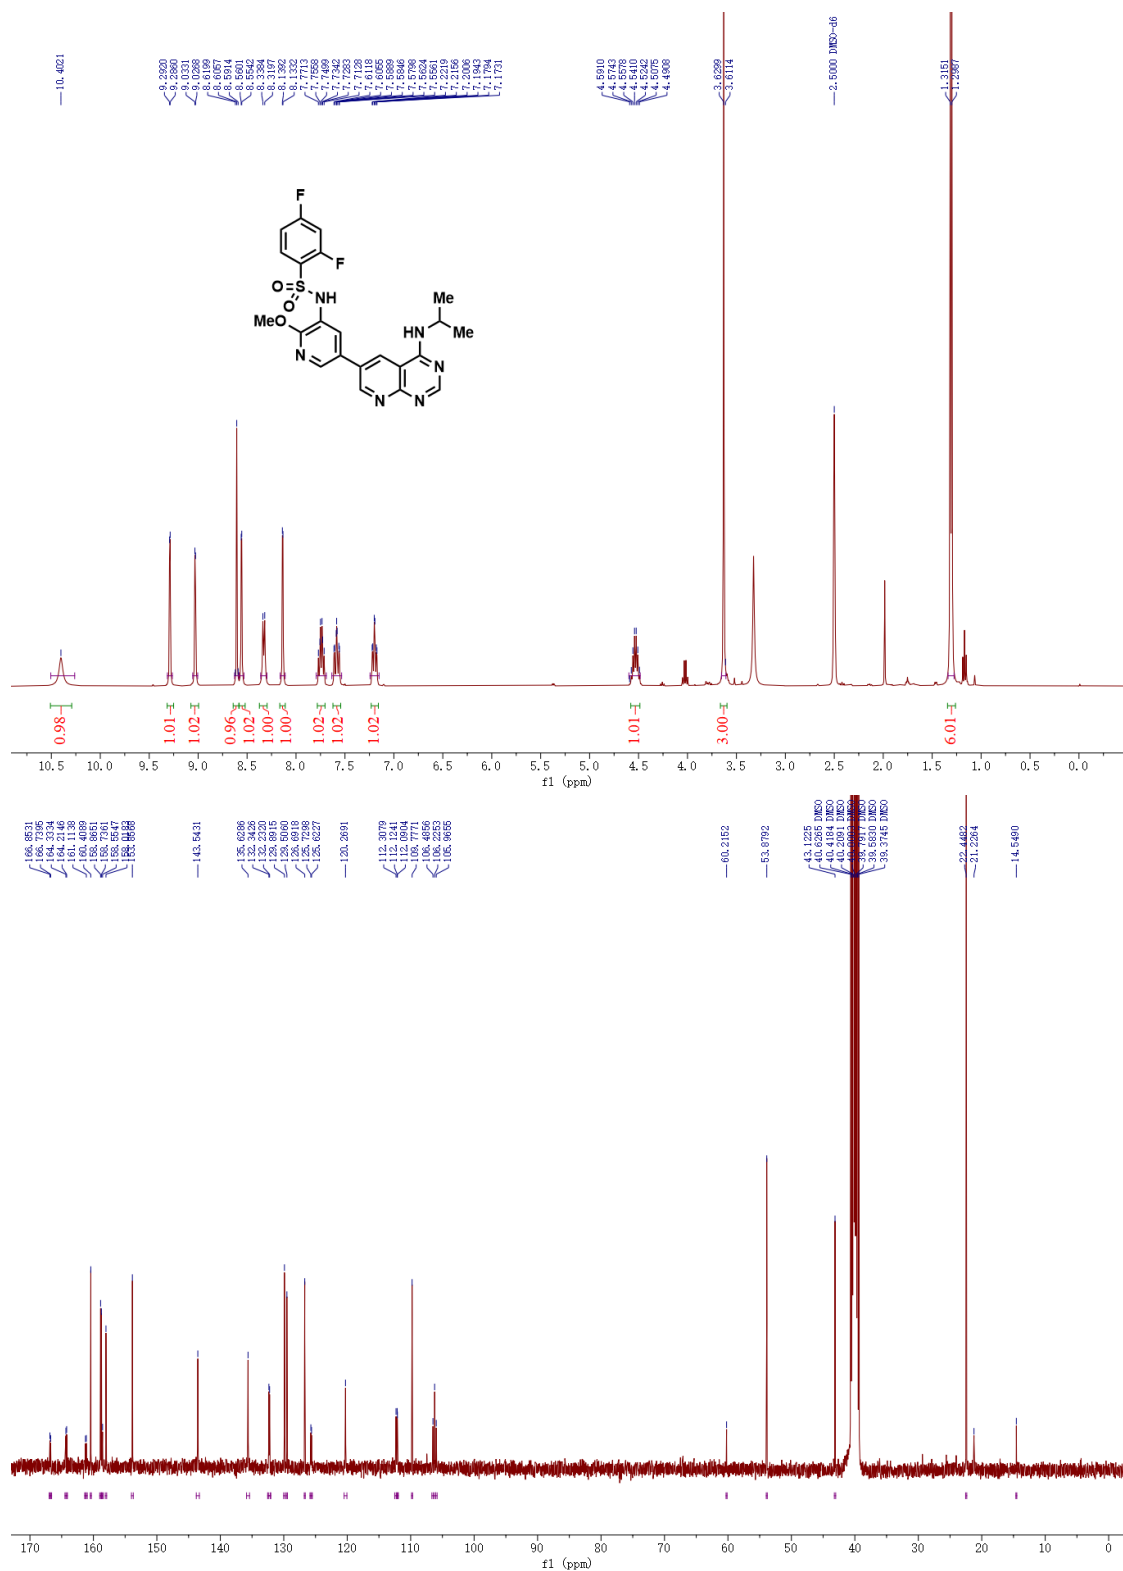

**Figure S13.** <sup>1</sup>H and <sup>13</sup>C NMR spectra of **17a** (DMSO-d<sub>6</sub>).

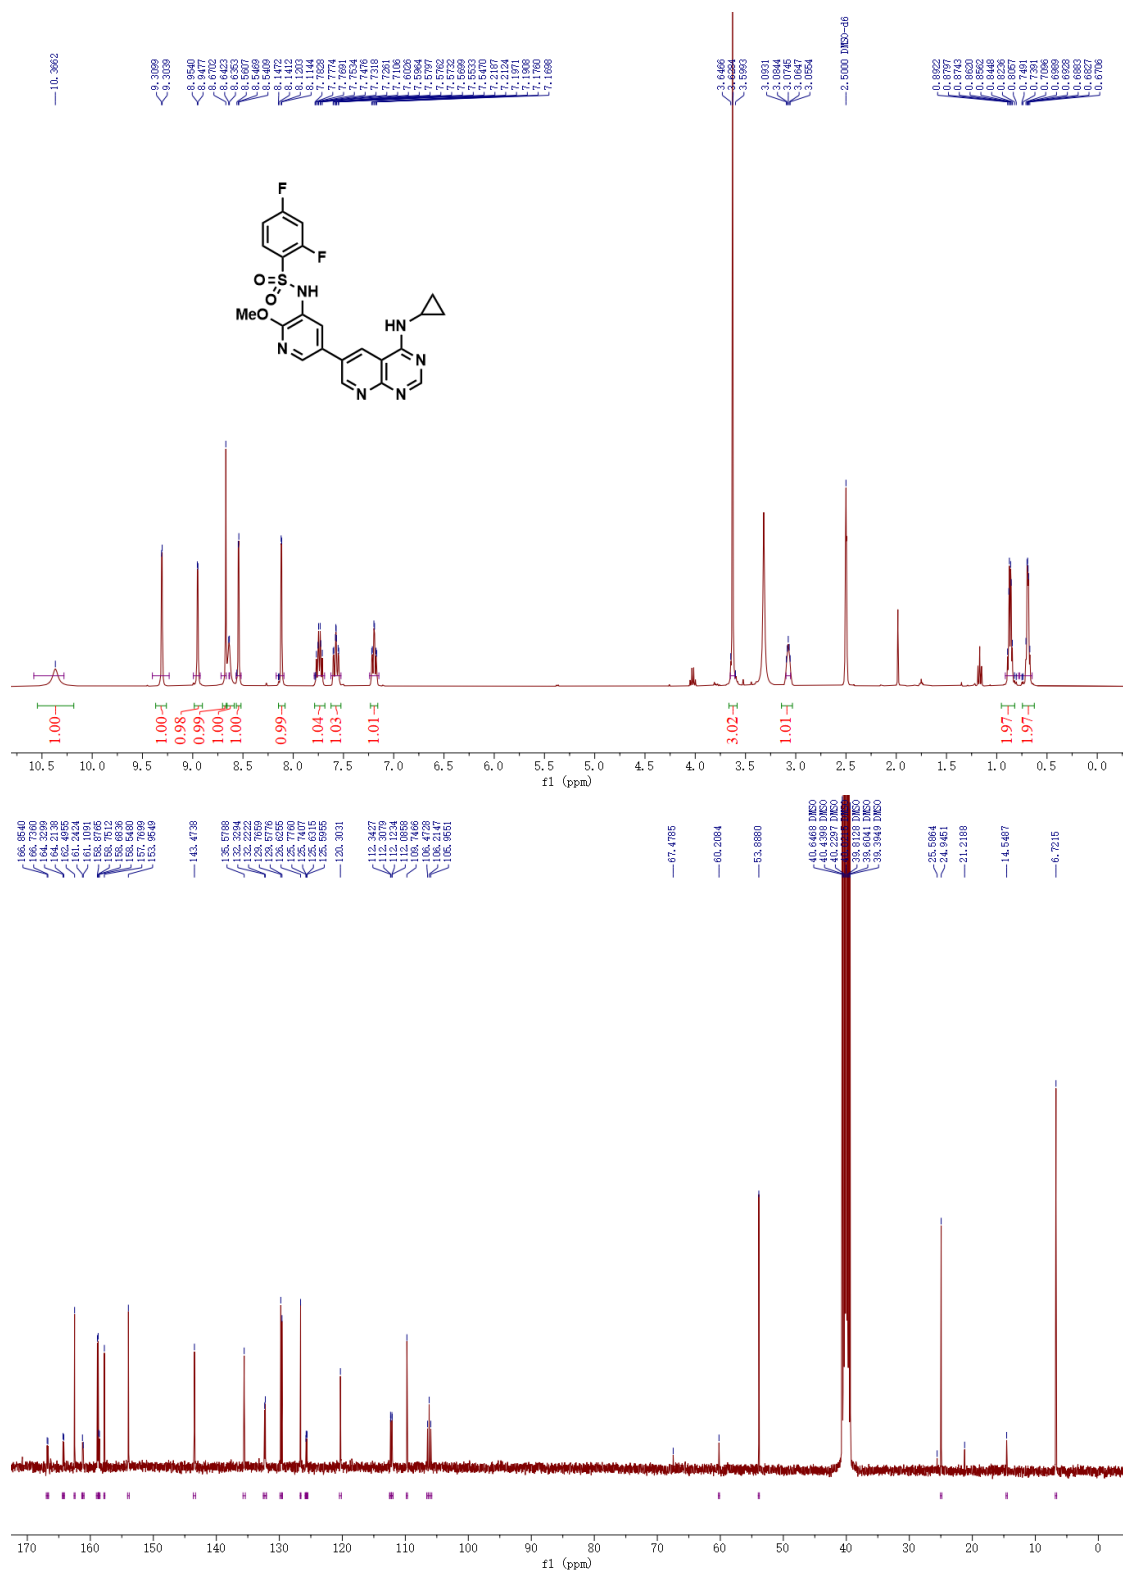

**Figure S14.** <sup>1</sup>H and <sup>13</sup>C NMR spectra of **17b** (DMSO-d<sub>6</sub>).

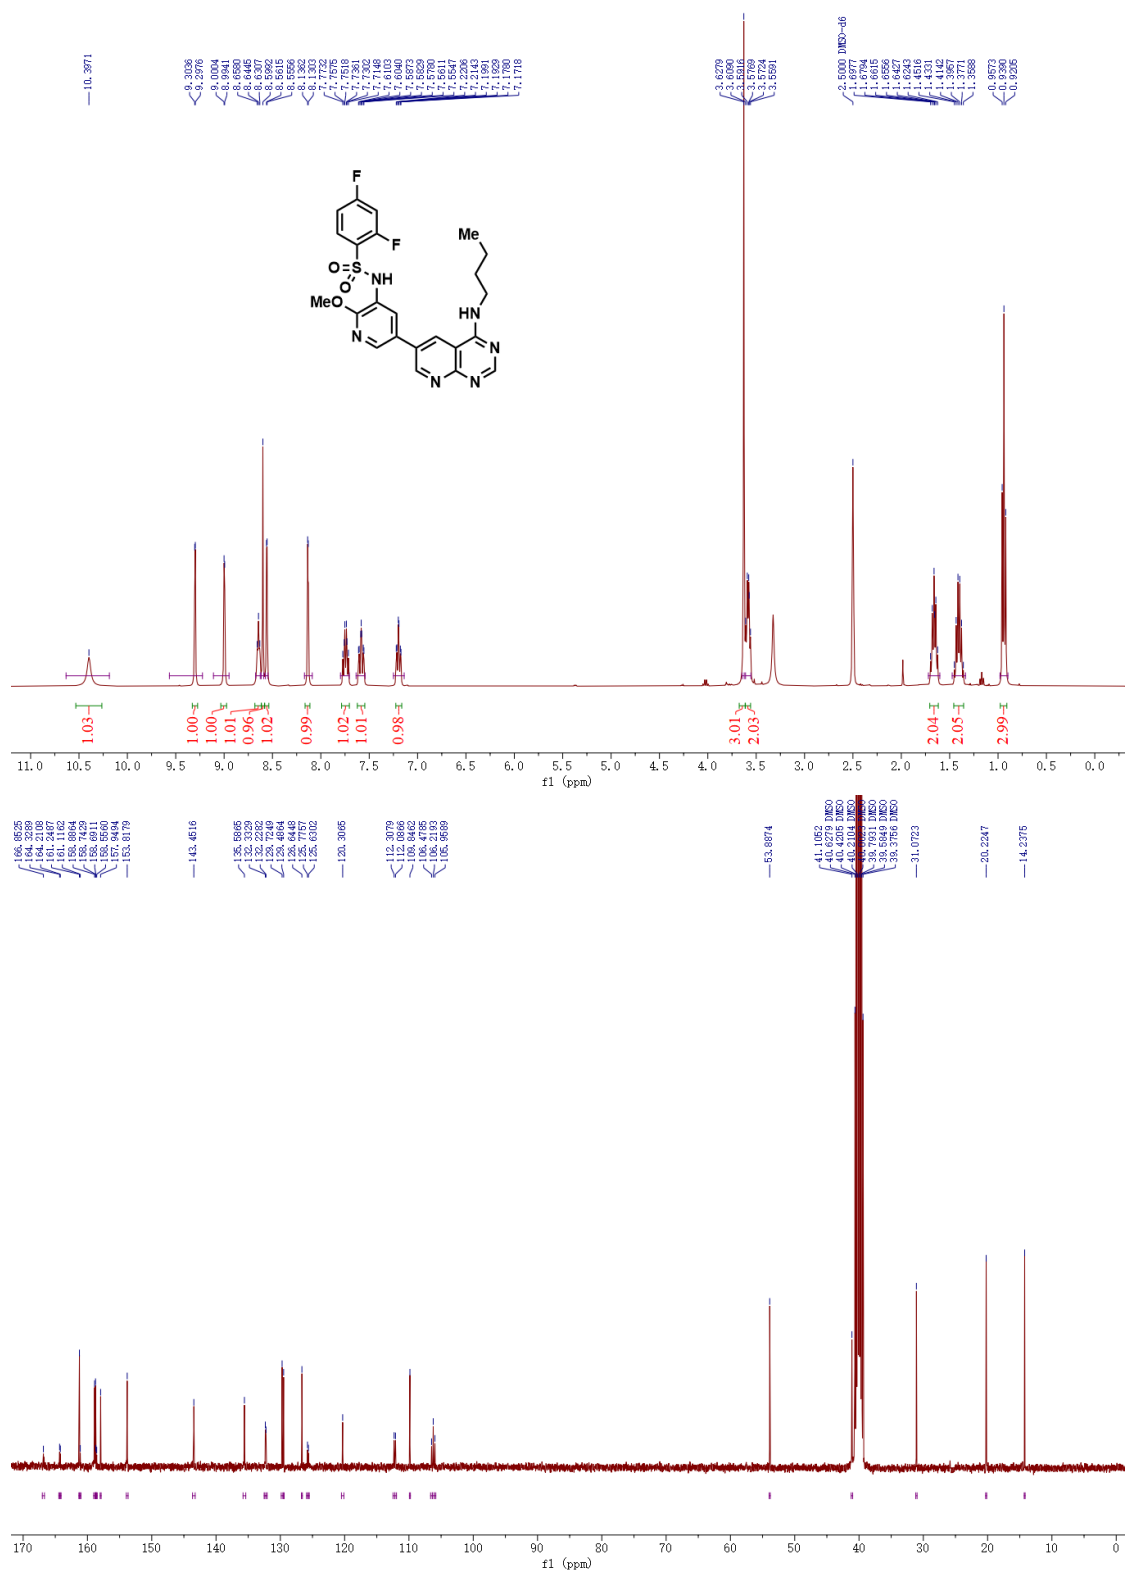

**Figure S15** <sup>1</sup>H and <sup>13</sup>C NMR spectra of **17c** (DMSO-d<sub>6</sub>).



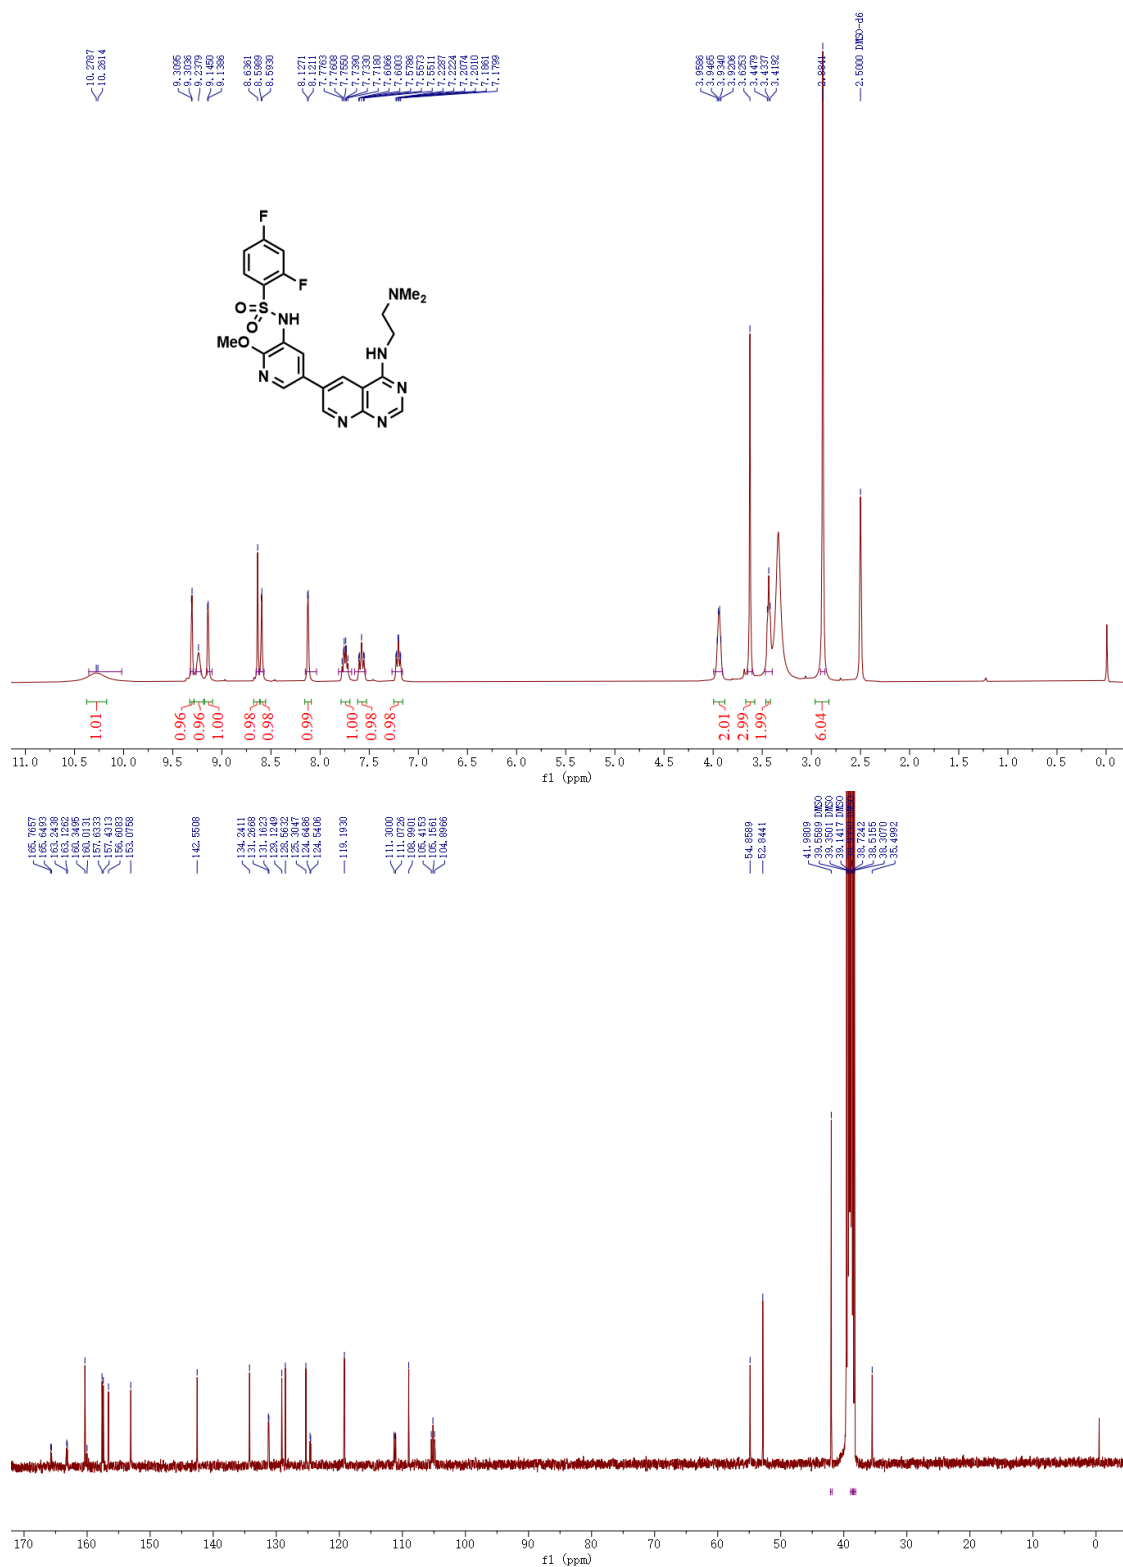

**Figure S16.** <sup>1</sup>H and <sup>13</sup>C NMR spectra of **17d** (DMSO-d<sub>6</sub>).

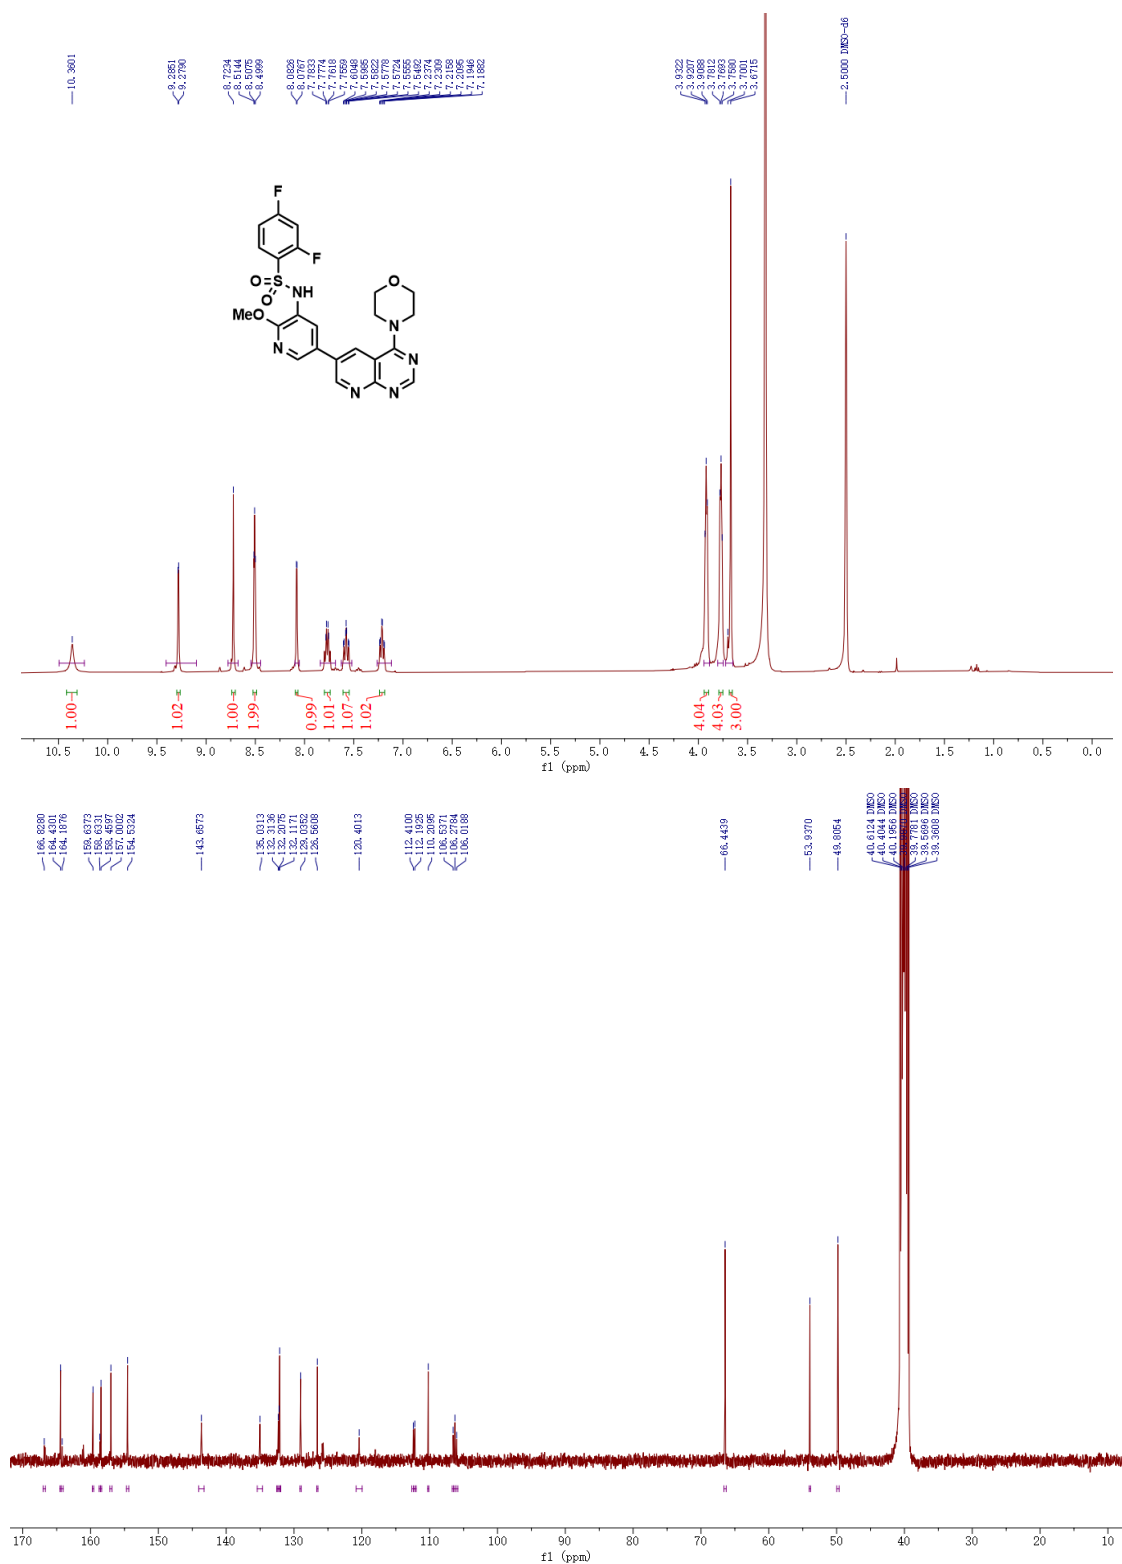

**Figure S17.** <sup>1</sup>H and <sup>13</sup>C NMR spectra of **17e** (DMSO-d<sub>6</sub>).



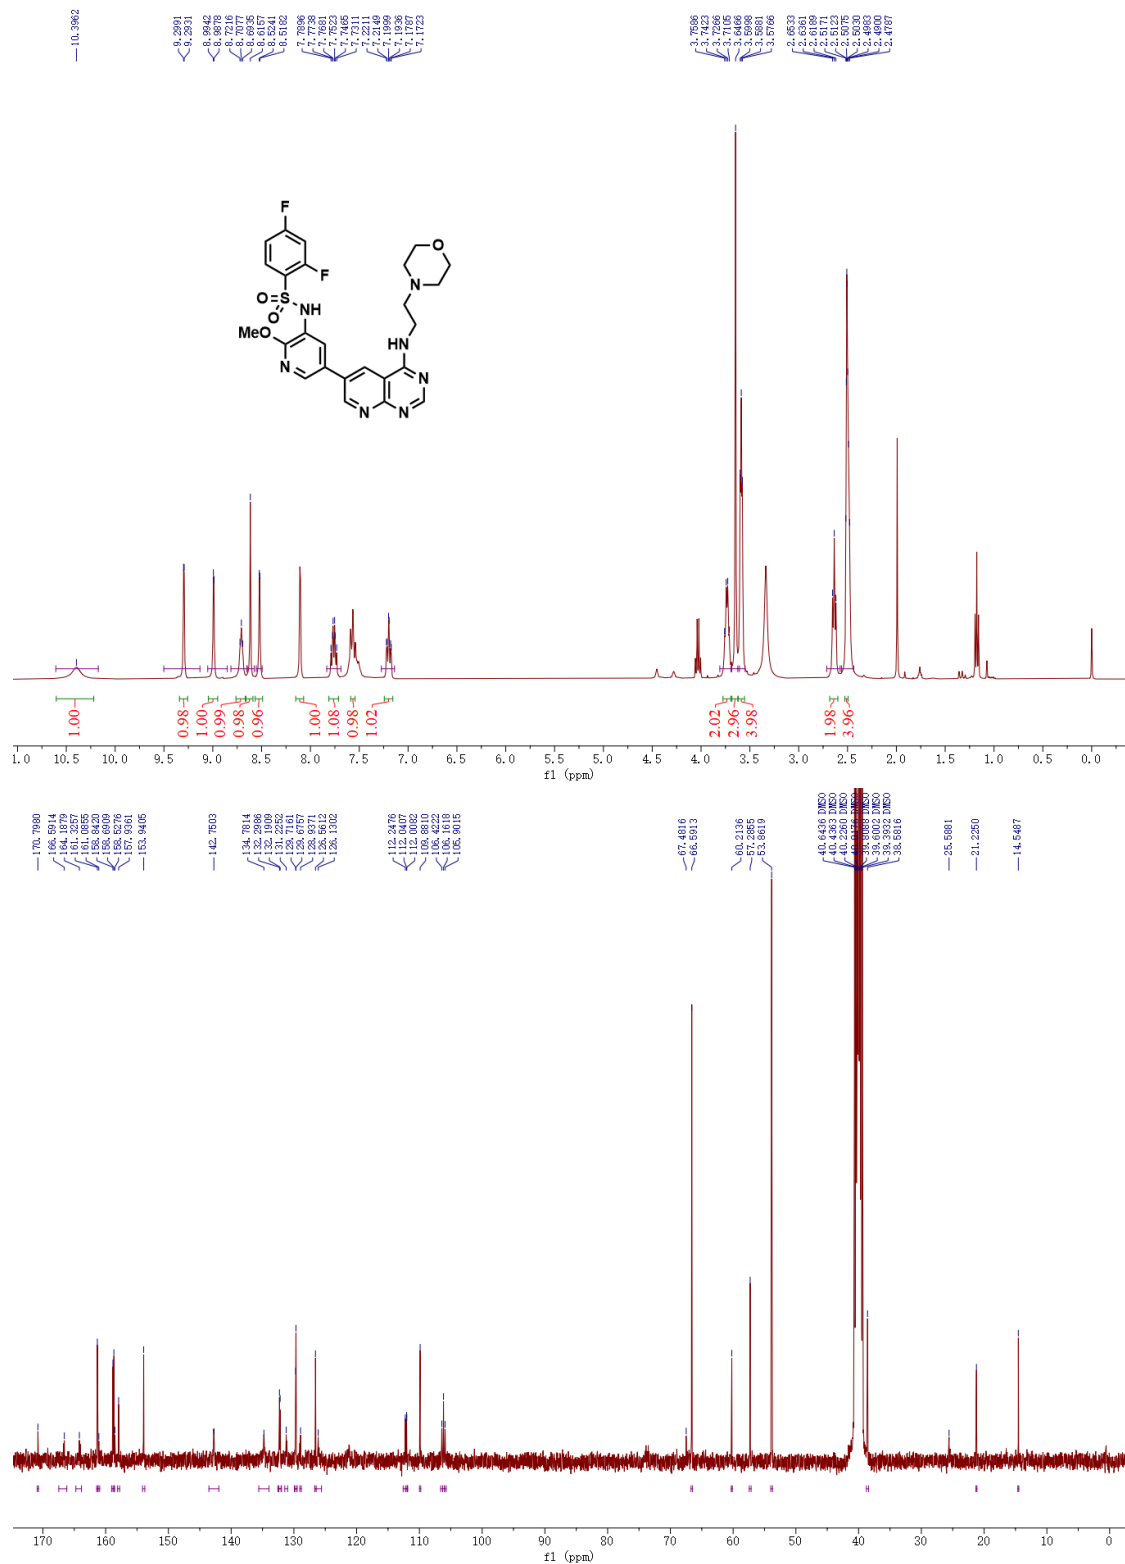

**Figure S19.** <sup>1</sup>H and <sup>13</sup>C NMR spectra of **17g** (DMSO-d<sub>6</sub>).

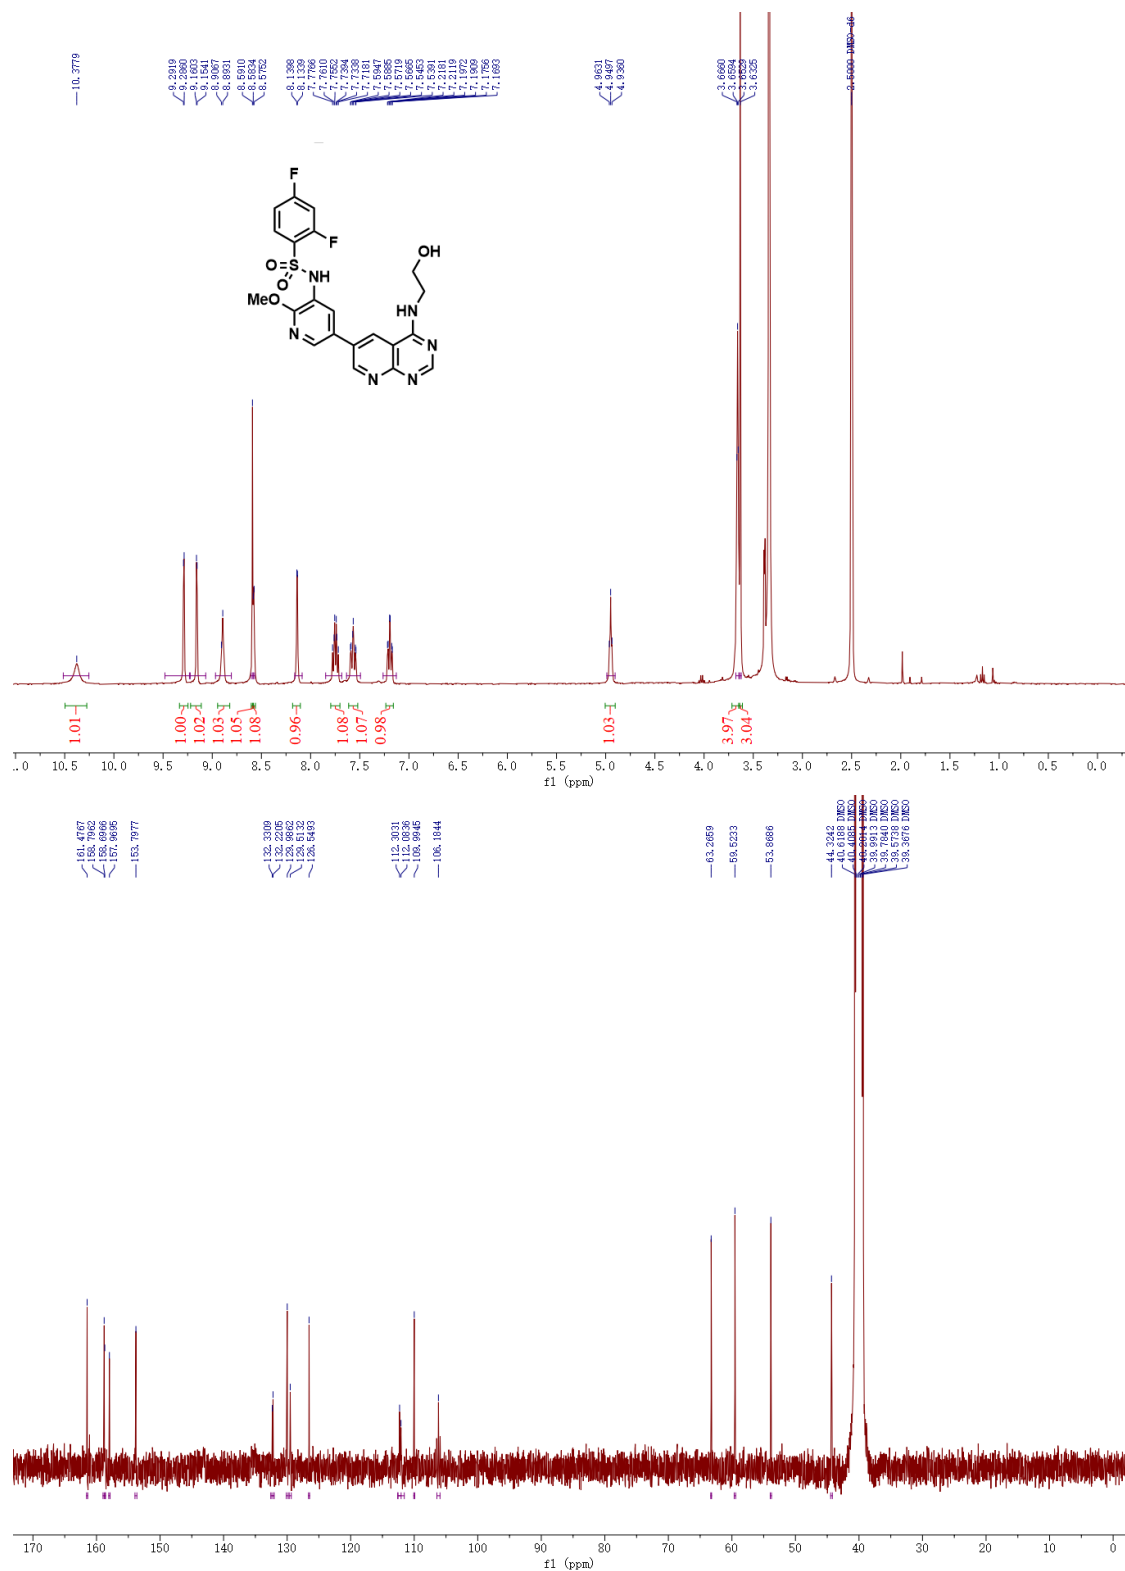

**Figure S20.** <sup>1</sup>H and <sup>13</sup>C NMR spectra of **17h** (DMSO-d<sub>6</sub>).

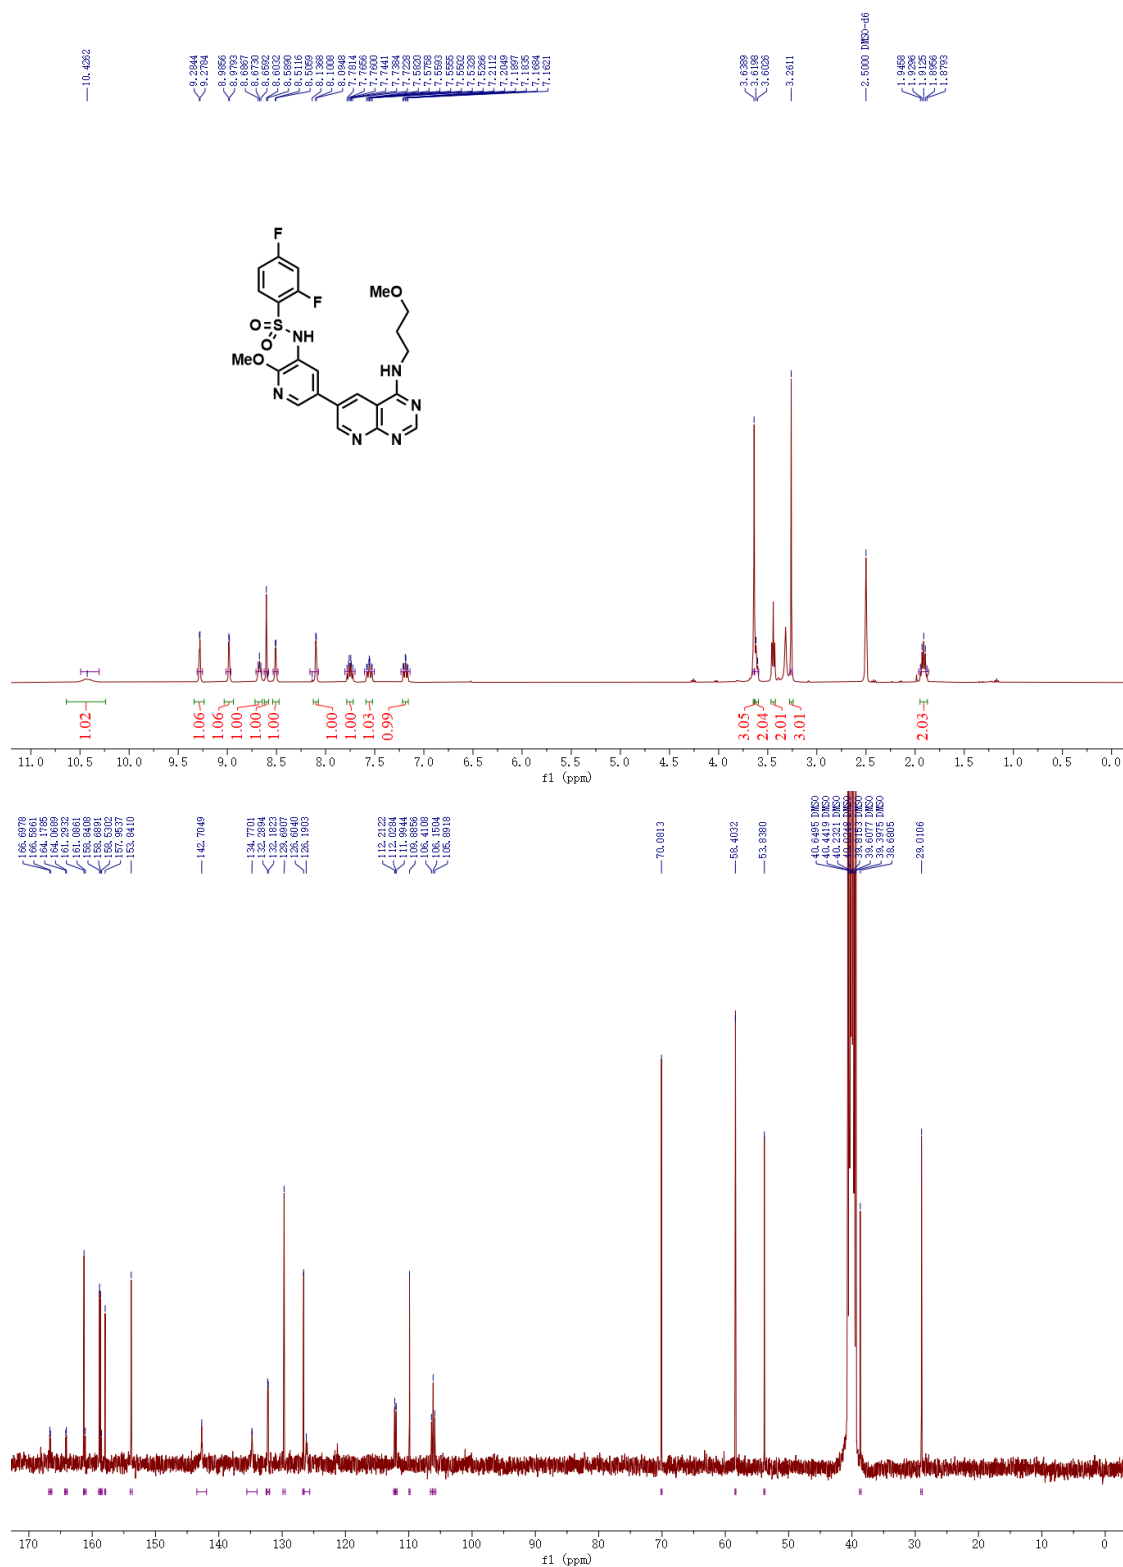

**Figure S21.** <sup>1</sup>H and <sup>13</sup>C NMR spectra of **17i** (DMSO-d<sub>6</sub>).

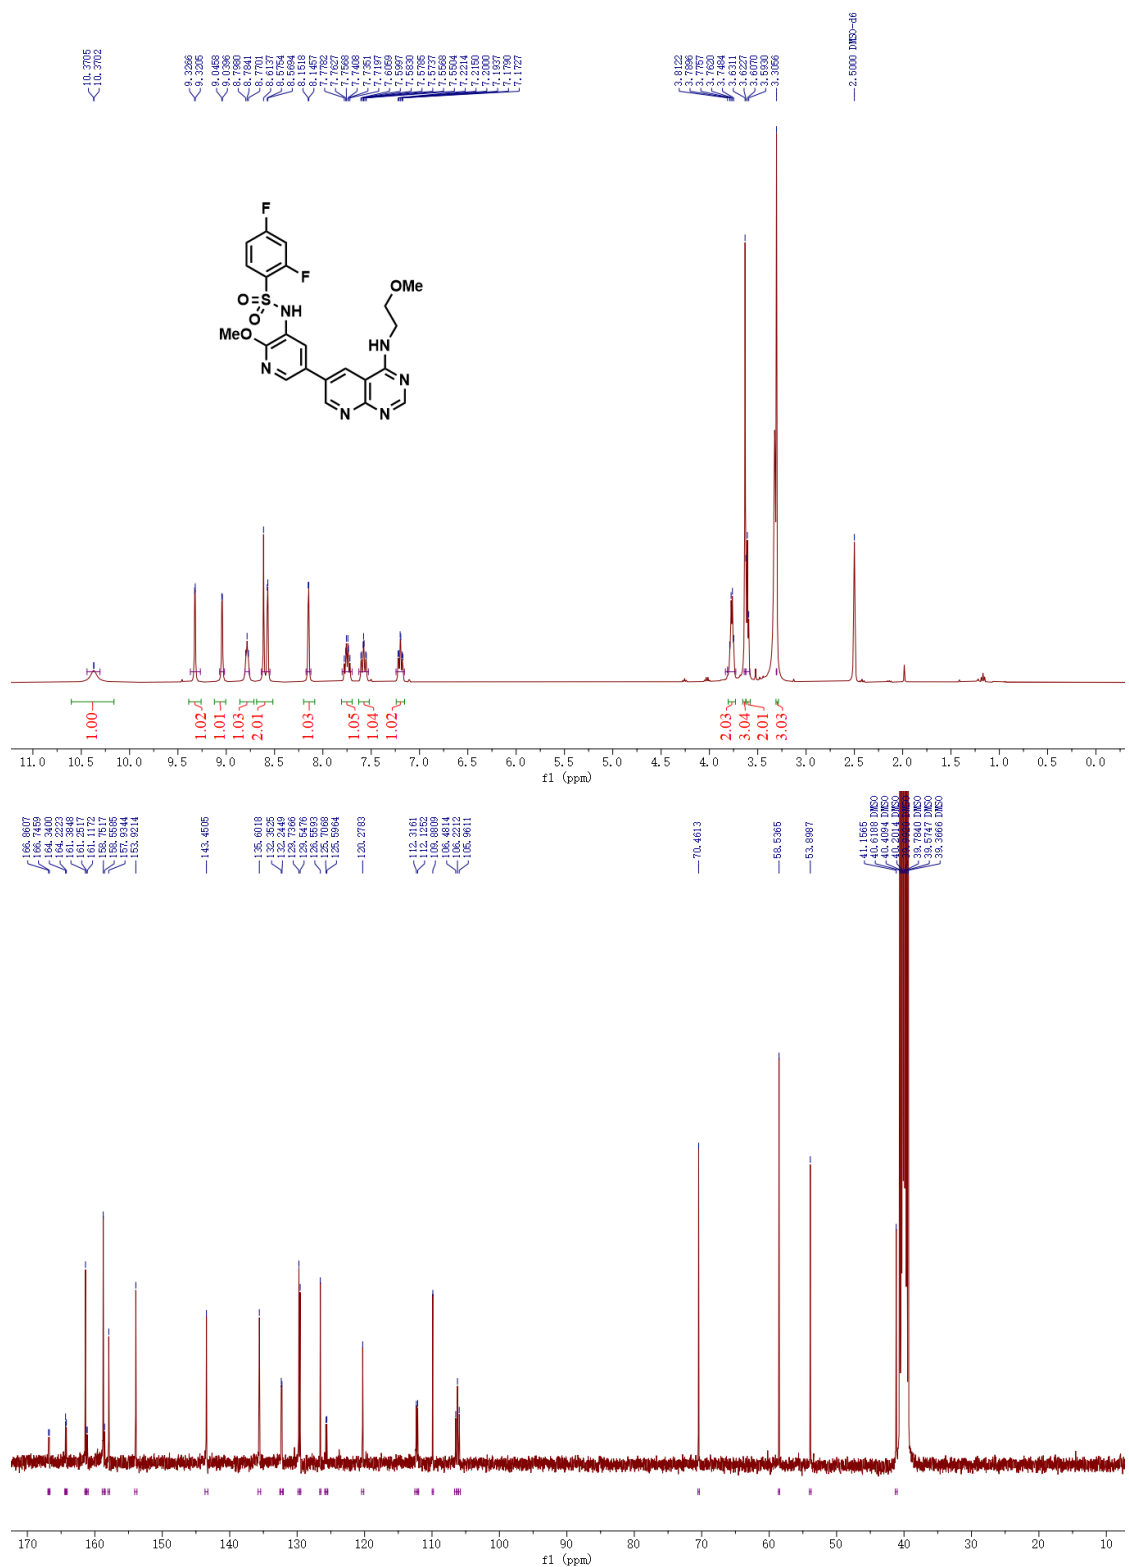

**Figure S22.** <sup>1</sup>H and <sup>13</sup>C NMR spectra of **17j** (DMSO-d<sub>6</sub>).







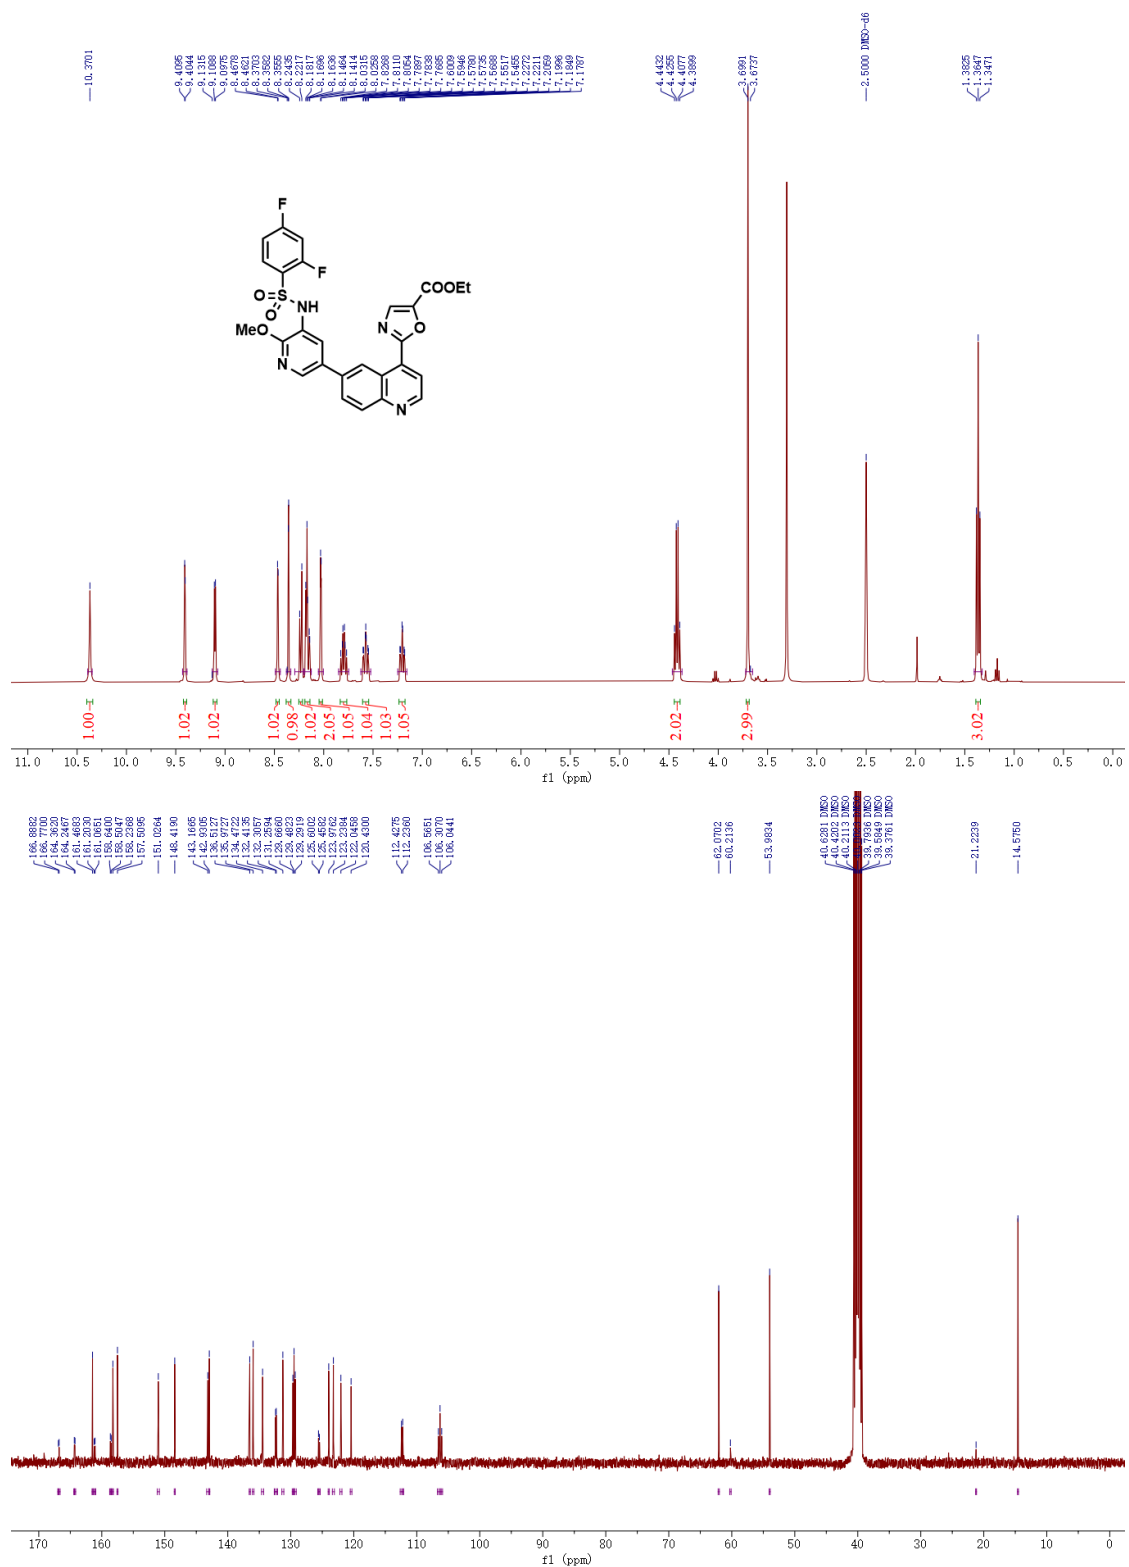

**Figure S25.** <sup>1</sup>H and <sup>13</sup>C NMR spectra of **22a** (DMSO-d<sub>6</sub>).

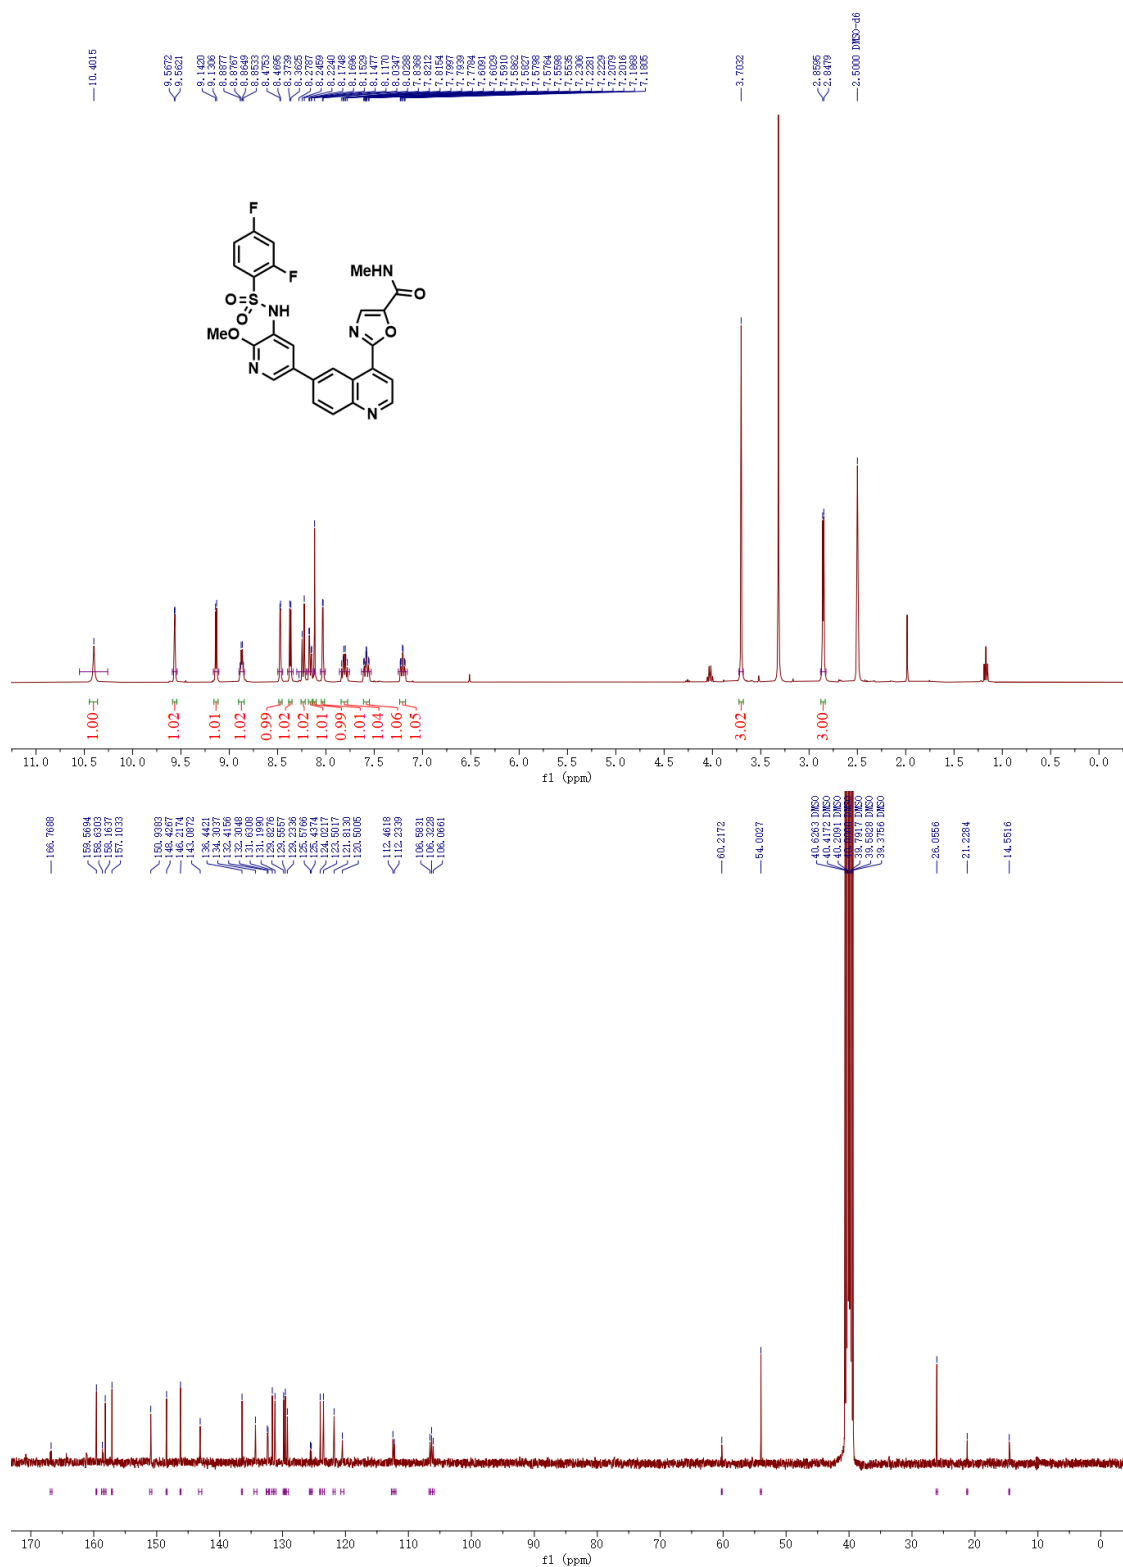

**Figure S26.** <sup>1</sup>H and <sup>13</sup>C NMR spectra of **22b** (DMSO-d<sub>6</sub>).

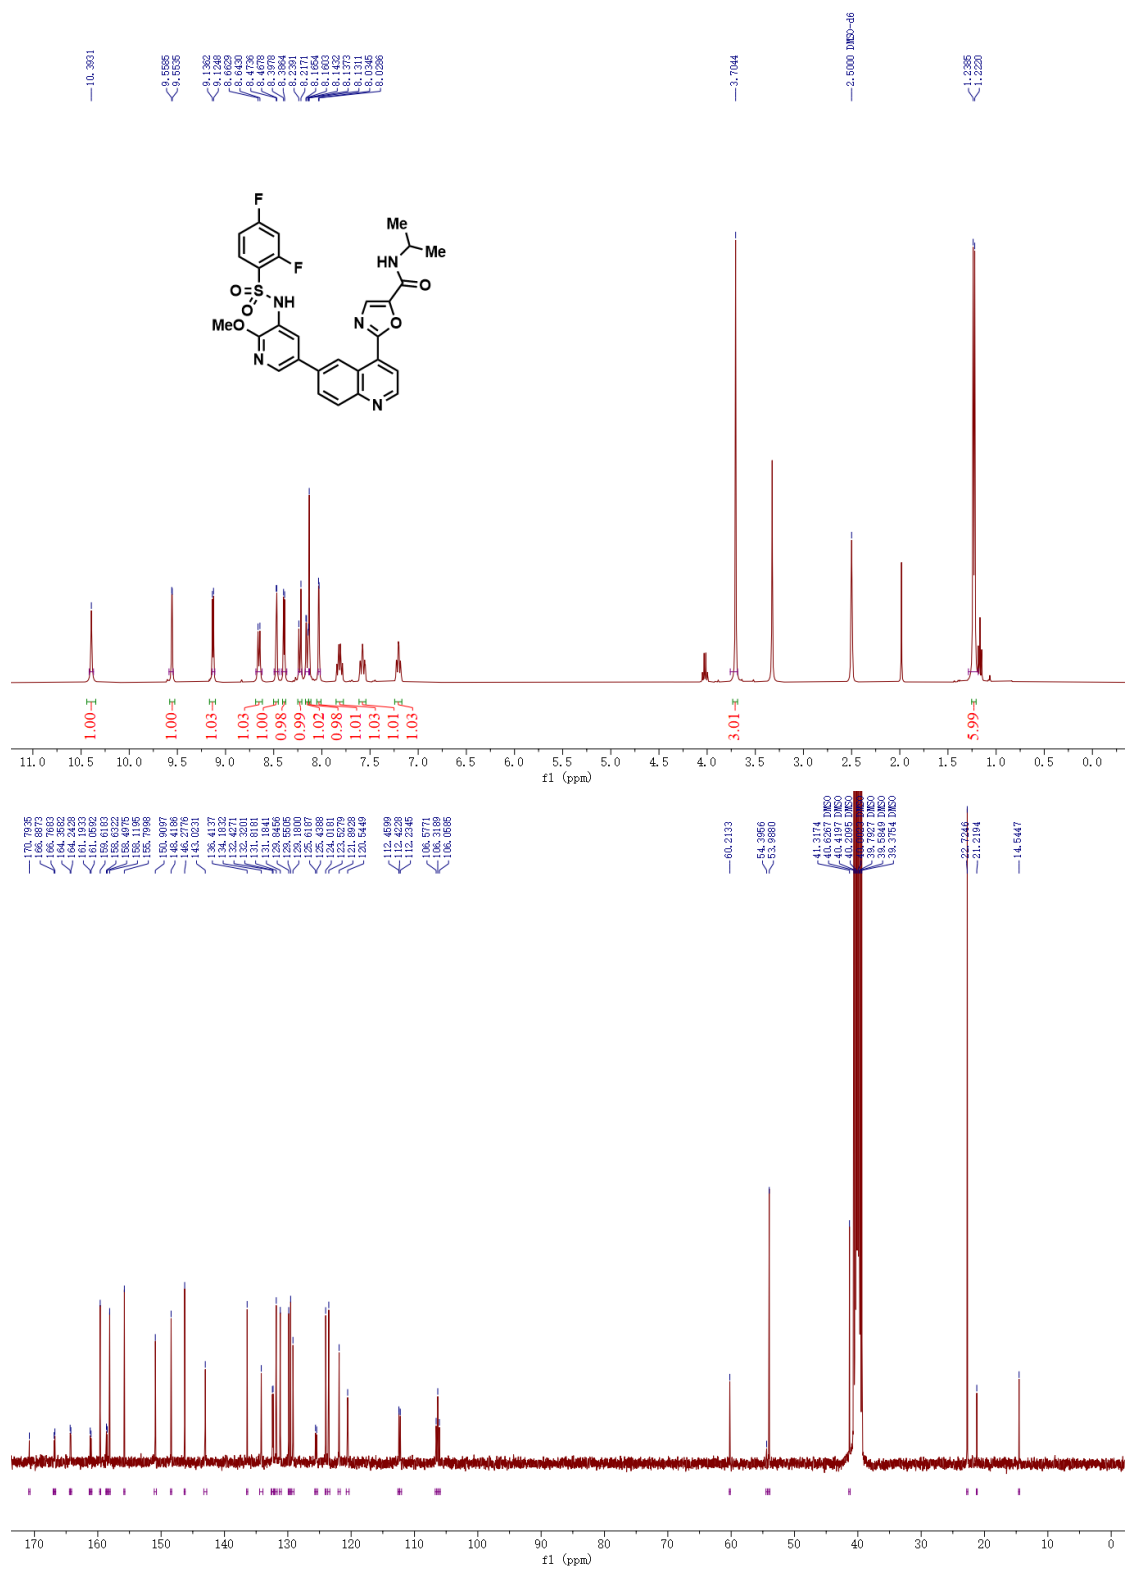

**Figure S27.**  $^1\text{H}$  and  $^{13}\text{C}$  NMR spectra of **22c** (DMSO- $d_6$ ).

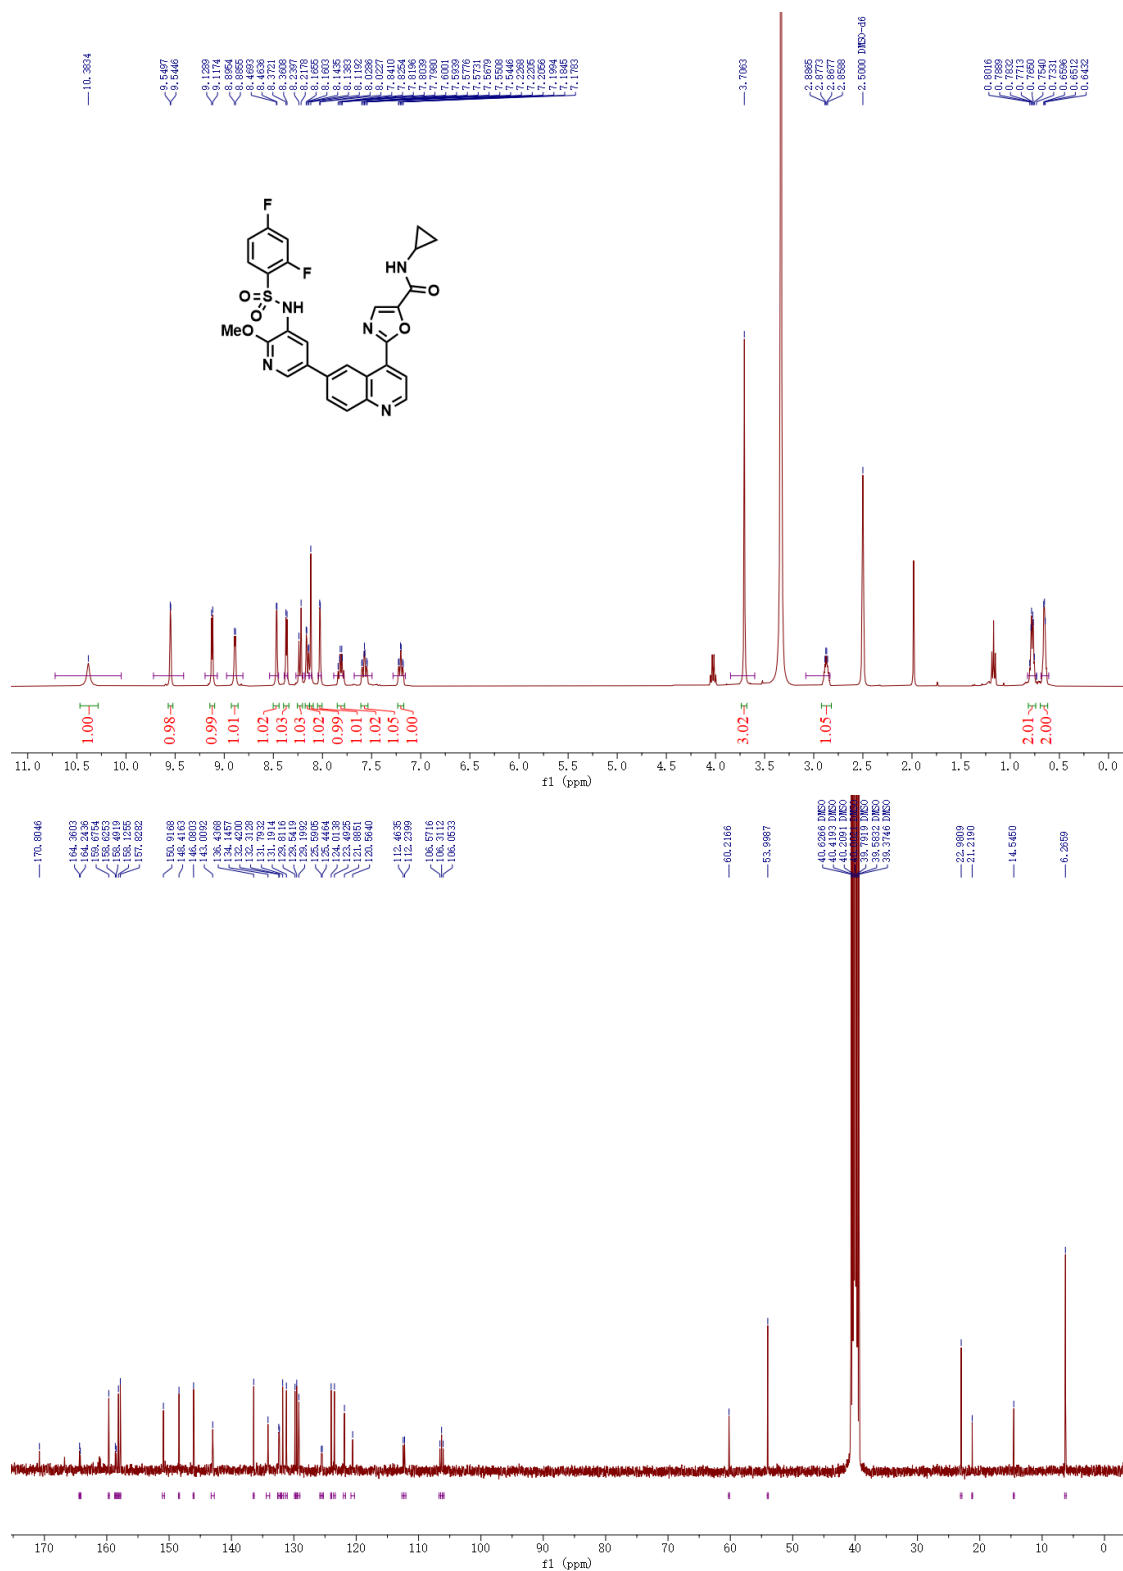

**Figure S28.** <sup>1</sup>H and <sup>13</sup>C NMR spectra of **22d** (DMSO-d<sub>6</sub>).

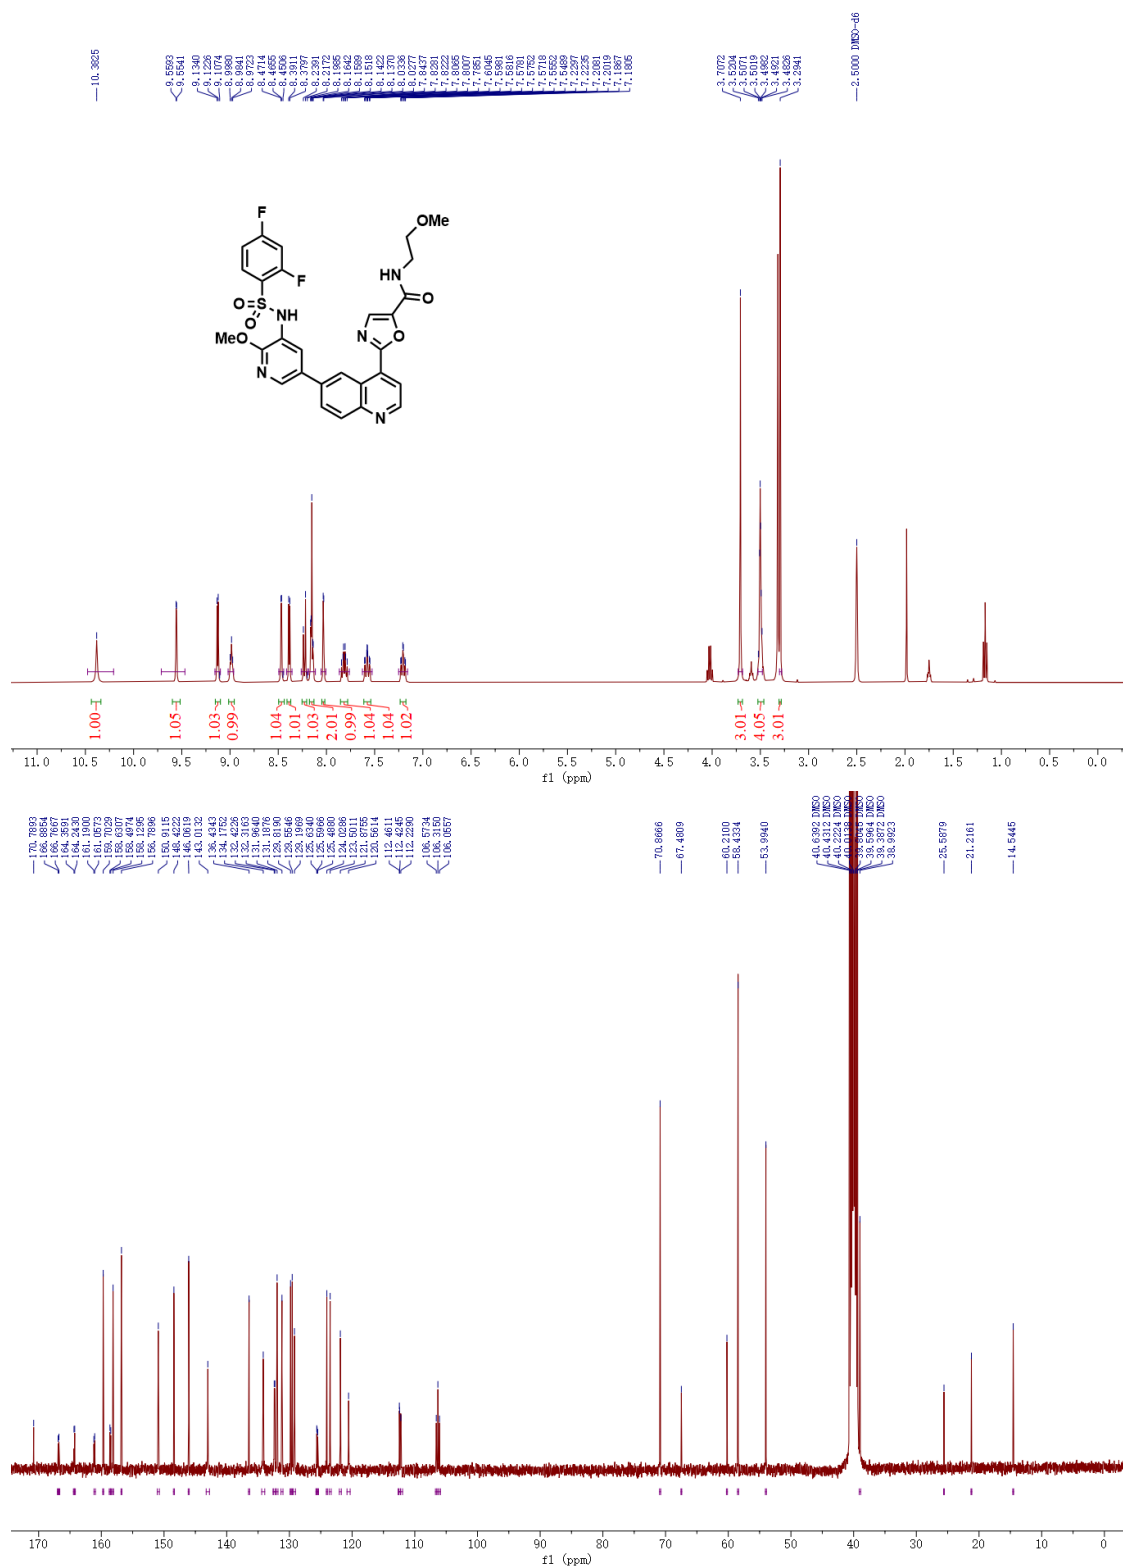

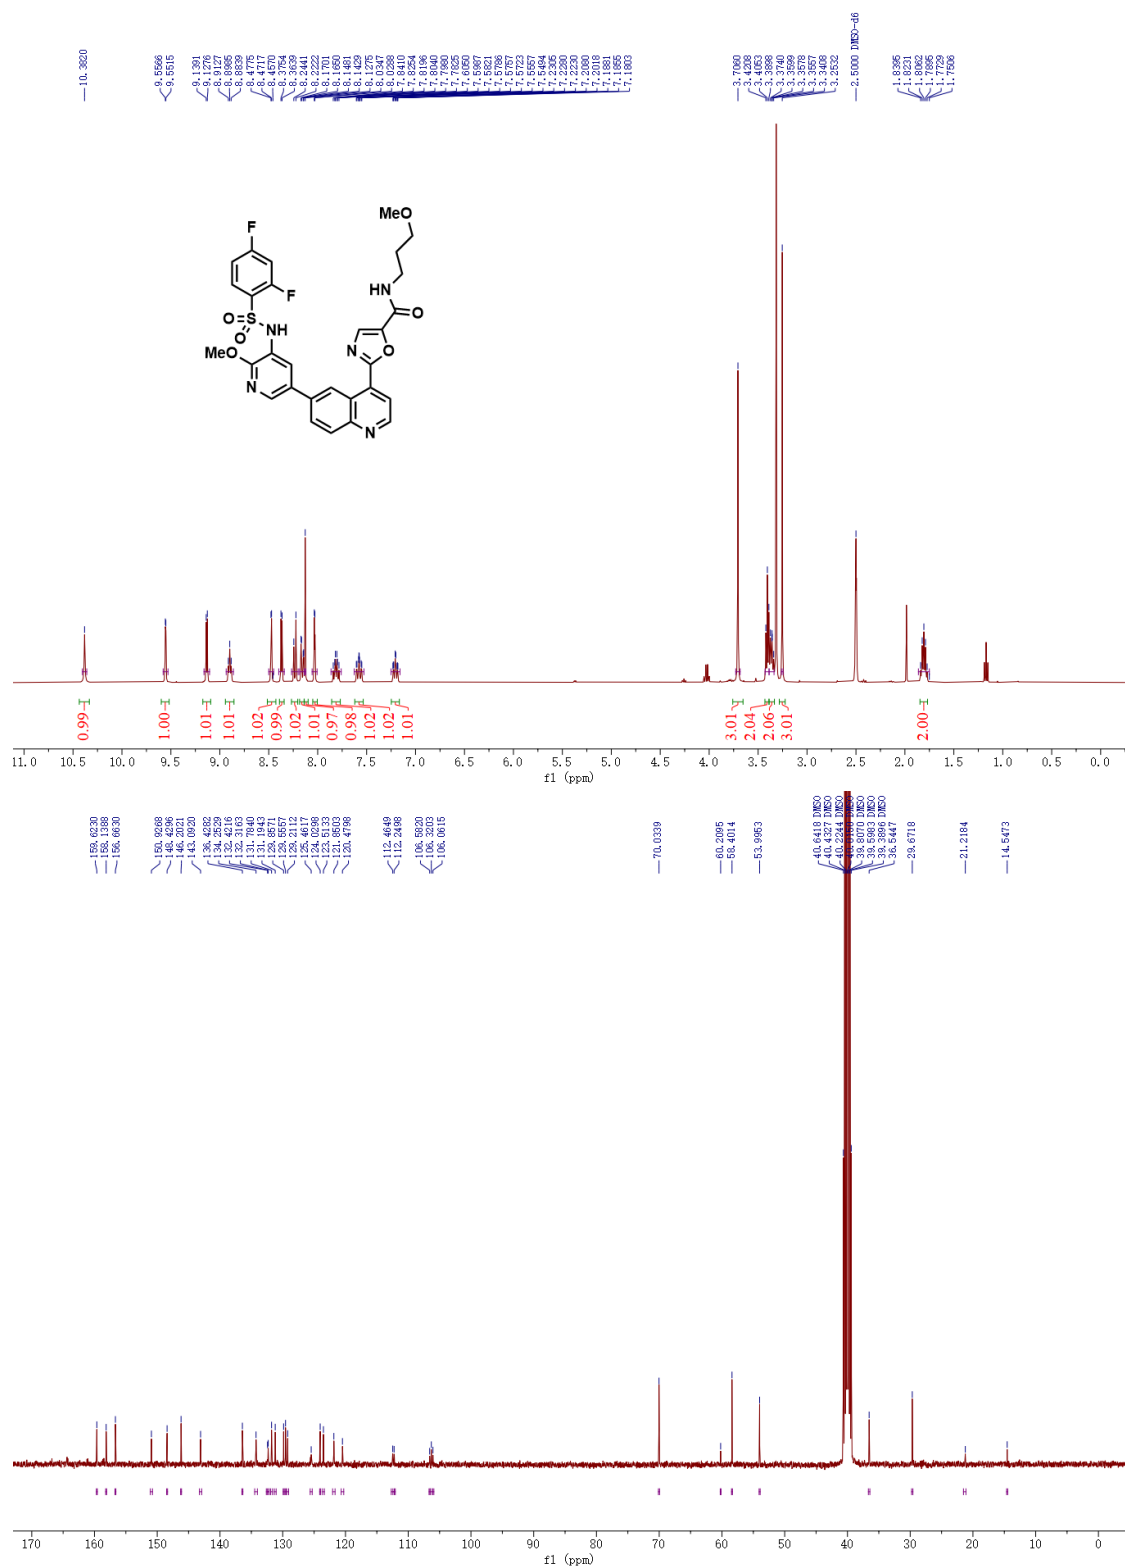

**Figure S30.** <sup>1</sup>H and <sup>13</sup>C NMR spectra of **22f** (DMSO-d<sub>6</sub>).





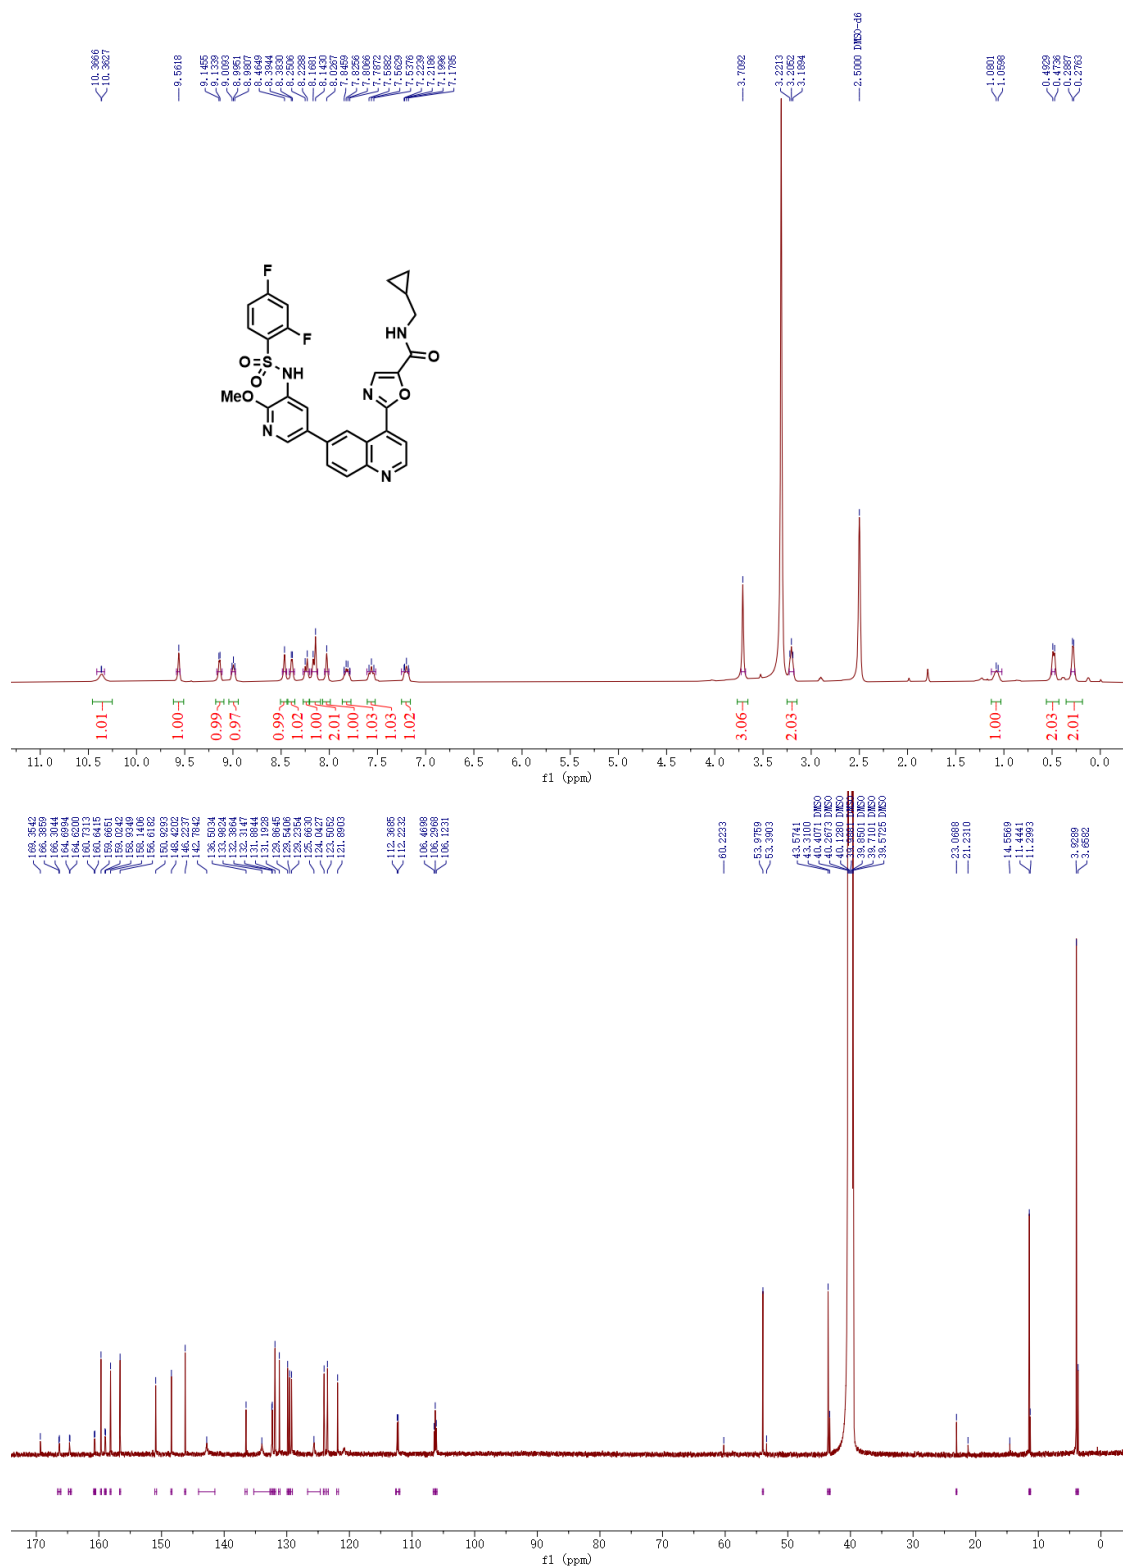

**Figure S32.** <sup>1</sup>H and <sup>13</sup>C NMR spectra of **22h** (DMSO-d<sub>6</sub>).

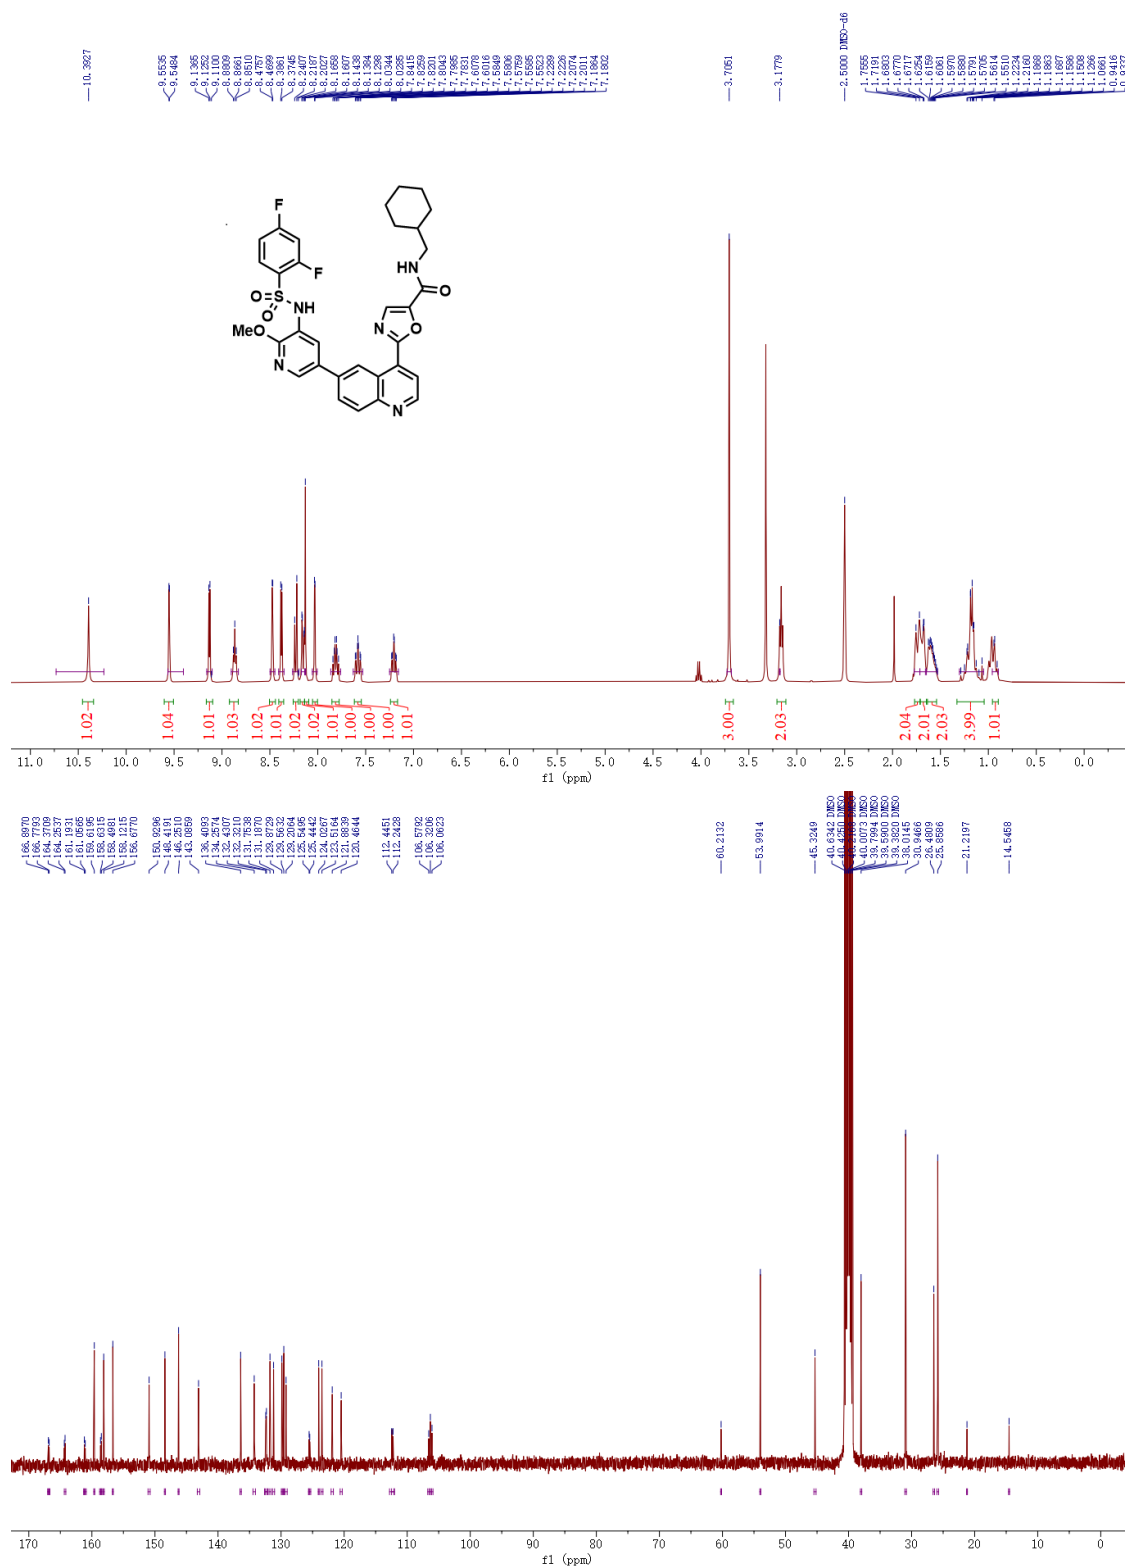

**Figure S33.** <sup>1</sup>H and <sup>13</sup>C NMR spectra of **22i** (DMSO-d<sub>6</sub>).

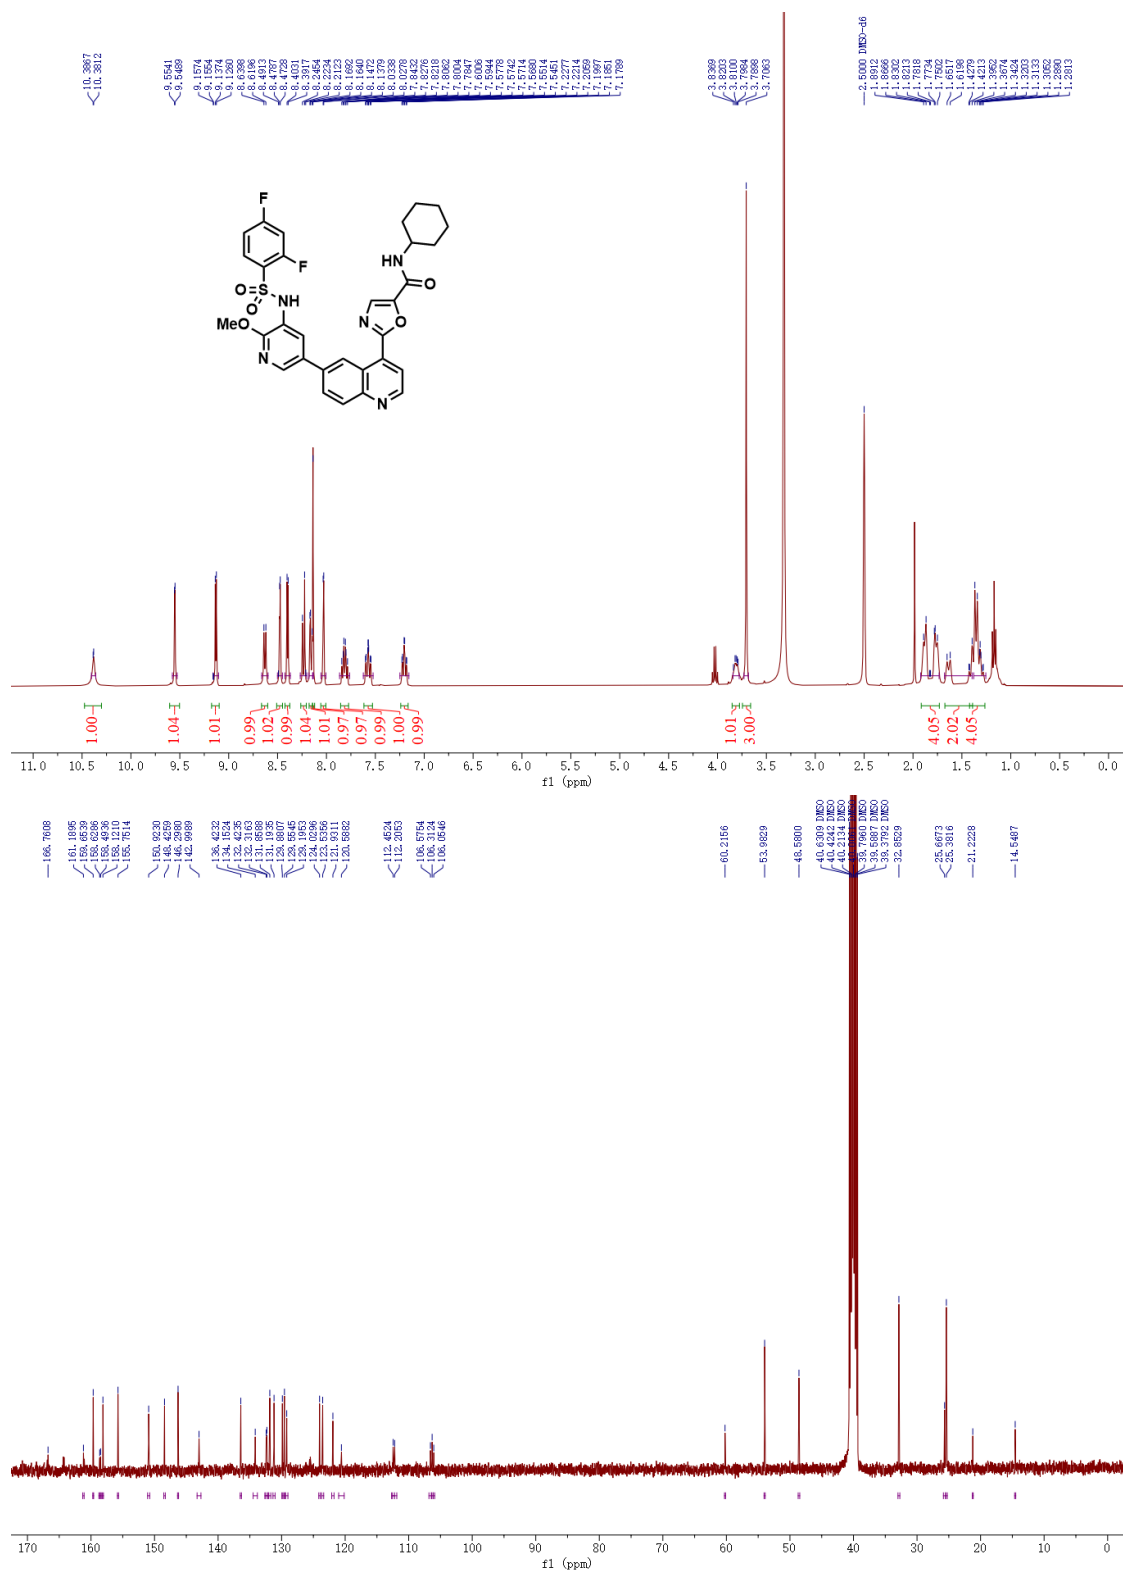

**Figure S34.** <sup>1</sup>H and <sup>13</sup>C NMR spectra of **22j** (DMSO-d<sub>6</sub>).

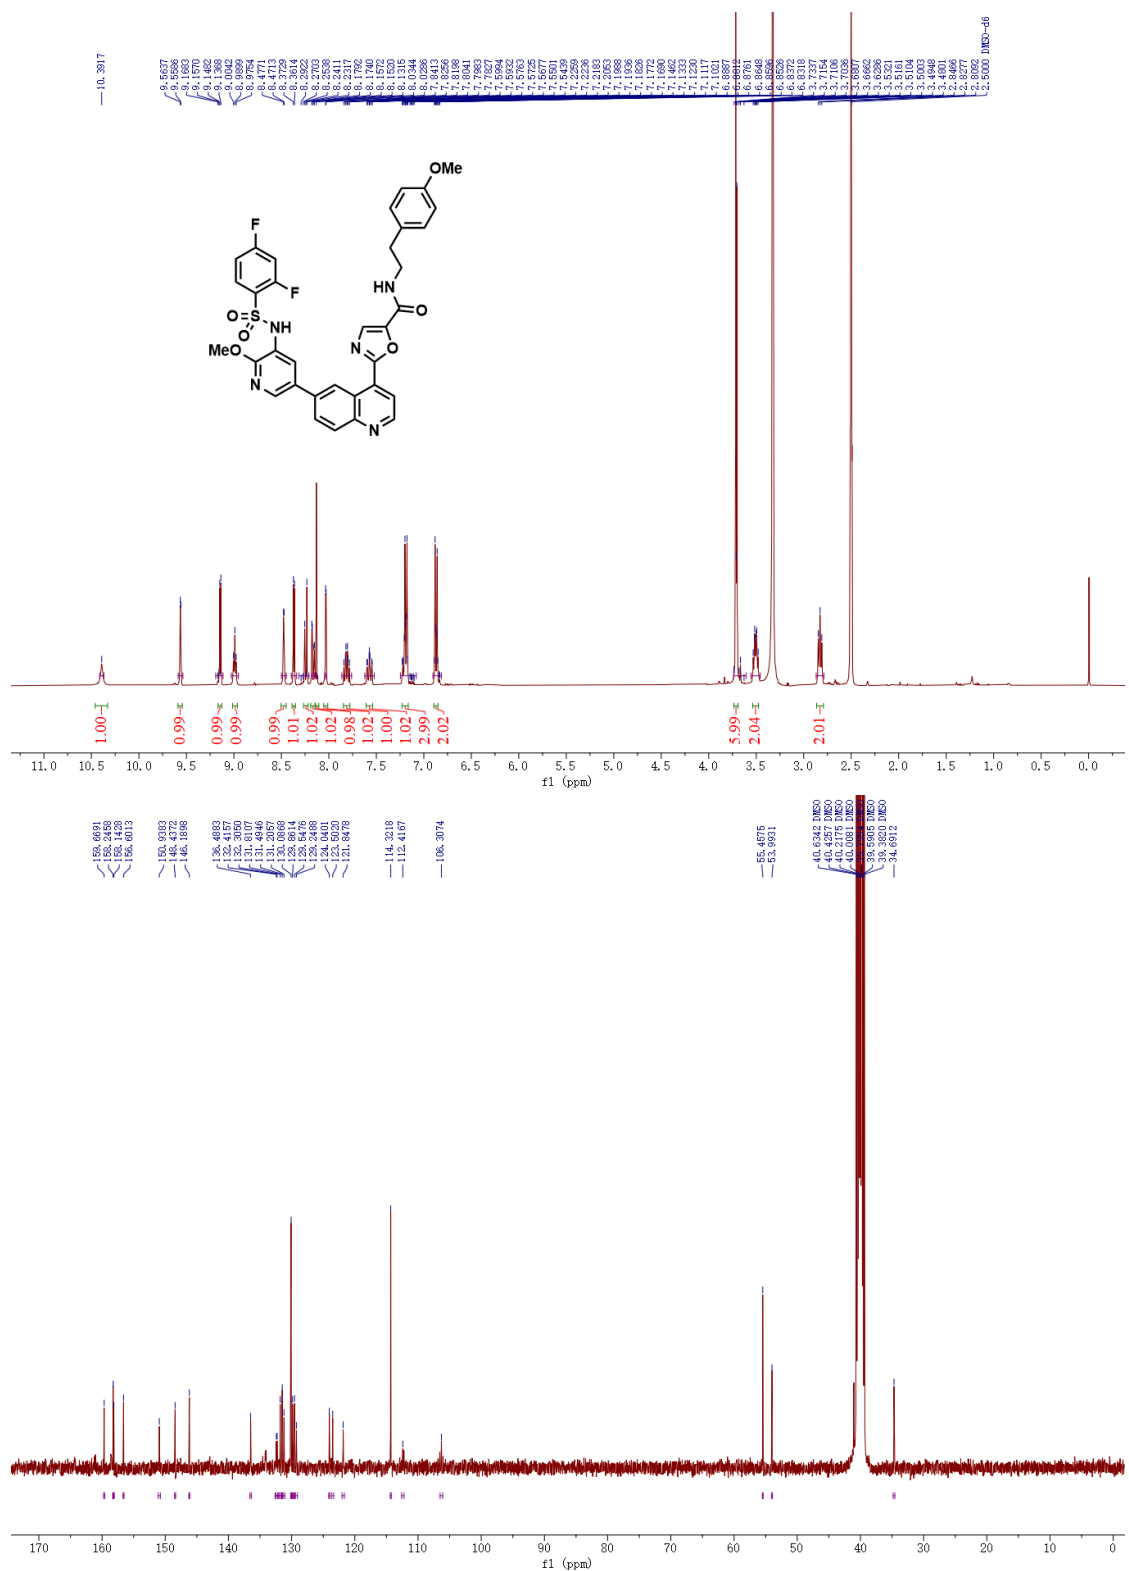

**Figure S35.** <sup>1</sup>H and <sup>13</sup>C NMR spectra of **22k** (DMSO-d<sub>6</sub>).

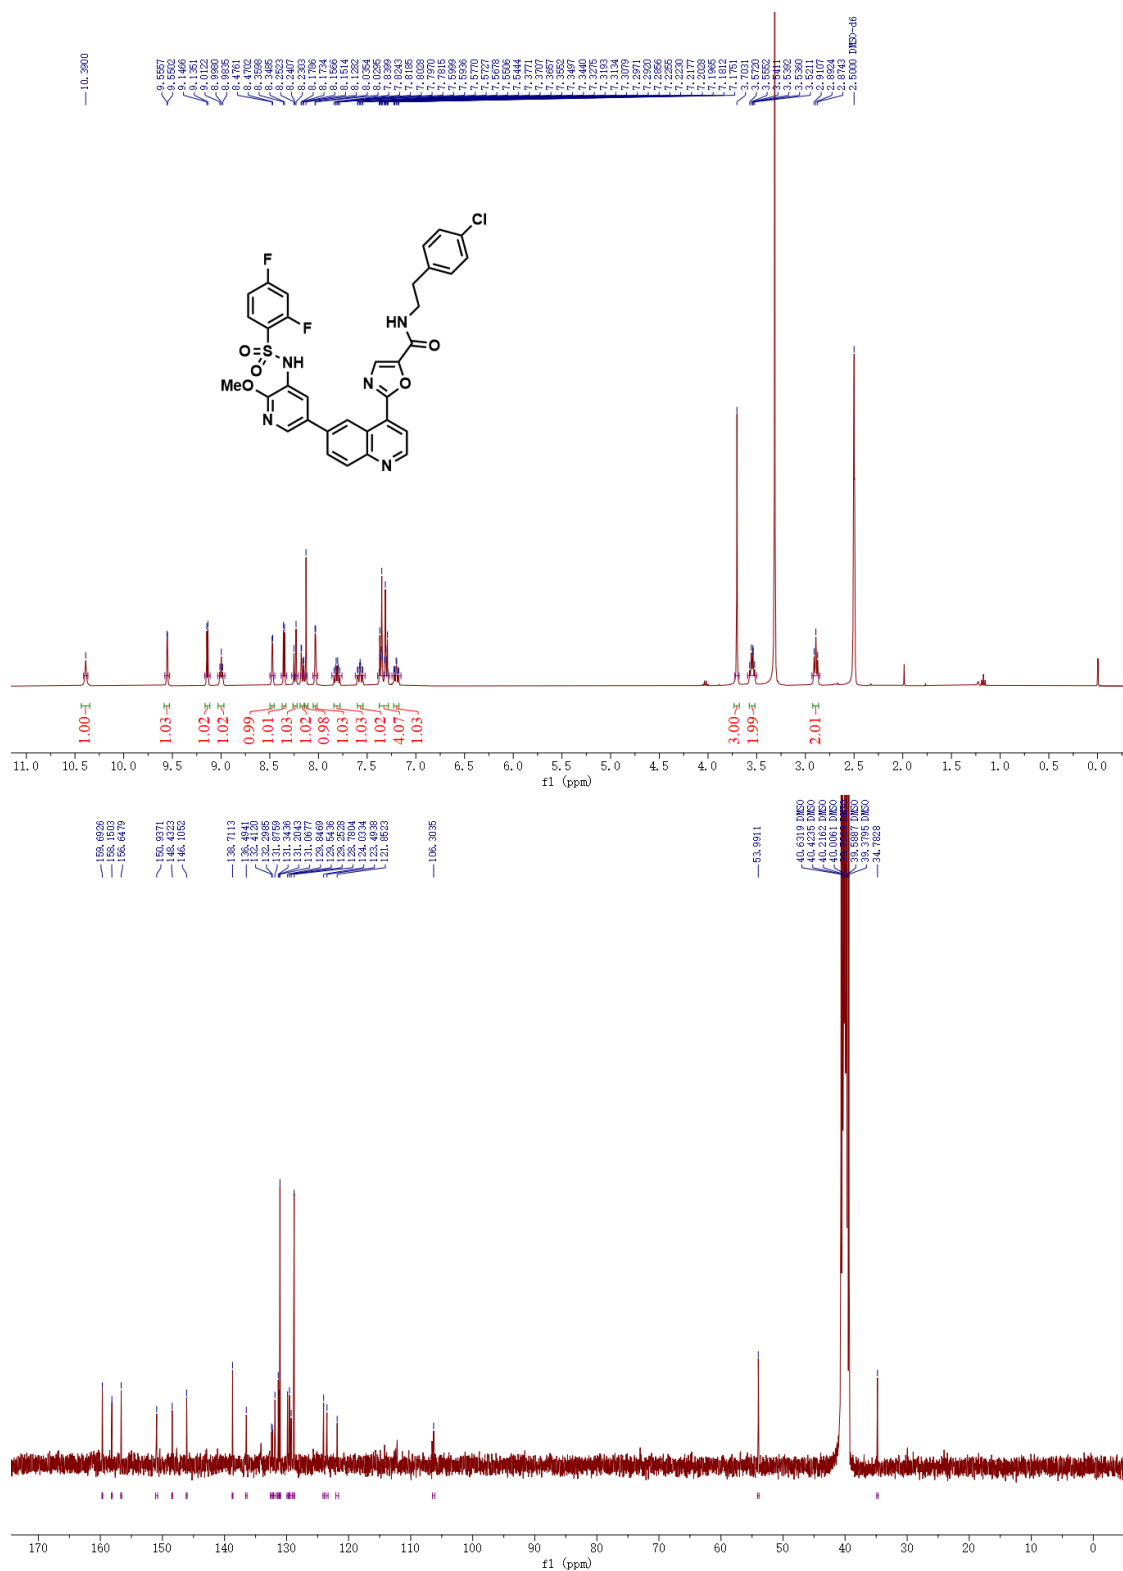

**Figure S36.** <sup>1</sup>H and <sup>13</sup>C NMR spectra of **221** (DMSO-d<sub>6</sub>).
